# Supplementary material for: Oaks drought-induced responses under root types: gene and microRNA cooperation
Source: BMC Plant Biol. 2025 Oct 1;25:1262. doi: 10.1186/s12870-025-07402-z (PMC12490147; doi:10.1186/s12870-025-07402-z)
Supplement: Supplementary file 6 — Supplementary Material 6. [file 12870_2025_7402_MOESM6_ESM.xlsx]

## Sheet: TR-DS_up-regulated
mature miRNA	logFC	miRBase link
qrb-miR172a	6.29345	https://www.mirbase.org/cgi-bin/mirna_entry.pl?acc=qrb-miR172a
qrb-miR164a	2.32004	https://www.mirbase.org/cgi-bin/mirna_entry.pl?acc=qrb-miR164a
qrb-miR166d	1.59386	https://www.mirbase.org/cgi-bin/mirna_entry.pl?acc=qrb-miR166d
qrb-miR166a	1.39517	https://www.mirbase.org/cgi-bin/mirna_entry.pl?acc=qrb-miR166a
qrb-miR171d	1.31681	https://www.mirbase.org/cgi-bin/mirna_entry.pl?acc=qrb-miR171d
qrb-miR393a	1.15787	https://www.mirbase.org/cgi-bin/mirna_entry.pl?acc=qrb-miR393a
qrb-miR160b	1.05955	https://www.mirbase.org/cgi-bin/mirna_entry.pl?acc=qrb-miR160b
qrb-miR167b	1.04605	https://www.mirbase.org/cgi-bin/mirna_entry.pl?acc=qrb-miR167b
qrb-miR408a	1.00991	https://www.mirbase.org/cgi-bin/mirna_entry.pl?acc=qrb-miR408a
qrb-miR403a	0.83604	https://www.mirbase.org/cgi-bin/mirna_entry.pl?acc=qrb-miR403a
qrb-miR162a	0.824291	https://www.mirbase.org/cgi-bin/mirna_entry.pl?acc=qrb-miR162a
novel_miRNA_UAGGAGUUGGAUGAGACAUUG	0.695915	https://www.mirbase.org/cgi-bin/mirna_entry.pl?acc=novel_miRNA_UAGGAGUUGGAUGAGACAUUG
qrb-miR398a	0.670258	https://www.mirbase.org/cgi-bin/mirna_entry.pl?acc=qrb-miR398a
qrb-miR396c	0.608478	https://www.mirbase.org/cgi-bin/mirna_entry.pl?acc=qrb-miR396c
novel_miRNA_UGUGGACUUGUUGUGCAAAUA	0.572123	https://www.mirbase.org/cgi-bin/mirna_entry.pl?acc=novel_miRNA_UGUGGACUUGUUGUGCAAAUA
qrb-miR396a	0.5568	https://www.mirbase.org/cgi-bin/mirna_entry.pl?acc=qrb-miR396a
qrb-miR156b	0.497226	https://www.mirbase.org/cgi-bin/mirna_entry.pl?acc=qrb-miR156b
qrb-miR157a	0.407354	https://www.mirbase.org/cgi-bin/mirna_entry.pl?acc=qrb-miR157a
qrb-miR390a	0.400501	https://www.mirbase.org/cgi-bin/mirna_entry.pl?acc=qrb-miR390a
qrb-miR171b	0.261354	https://www.mirbase.org/cgi-bin/mirna_entry.pl?acc=qrb-miR171b
qrb-miR167a	0.248796	https://www.mirbase.org/cgi-bin/mirna_entry.pl?acc=qrb-miR167a
novel_miRNA_UCUGUCGUGGGAGAGAUGACGC	0.248347	https://www.mirbase.org/cgi-bin/mirna_entry.pl?acc=novel_miRNA_UCUGUCGUGGGAGAGAUGACGC
novel_miRNA_ACCGUGUUUCUCUGUAUAACG	0.211476	https://www.mirbase.org/cgi-bin/mirna_entry.pl?acc=novel_miRNA_ACCGUGUUUCUCUGUAUAACG
qrb-miR166c	0.187294	https://www.mirbase.org/cgi-bin/mirna_entry.pl?acc=qrb-miR166c
novel_miRNA_UUAGUCCAAGACUCGGCCACA	0.16882	https://www.mirbase.org/cgi-bin/mirna_entry.pl?acc=novel_miRNA_UUAGUCCAAGACUCGGCCACA
novel_miRNA_UUUCAGAAUGAGAGGCAAGUC	0.100808	https://www.mirbase.org/cgi-bin/mirna_entry.pl?acc=novel_miRNA_UUUCAGAAUGAGAGGCAAGUC
qrb-miR398b	0.0802086	https://www.mirbase.org/cgi-bin/mirna_entry.pl?acc=qrb-miR398b
qrb-miR164d	0.0761467	https://www.mirbase.org/cgi-bin/mirna_entry.pl?acc=qrb-miR164d
novel_miRNA_CCGGUCUGCUCGUCCC	0.0617369	https://www.mirbase.org/cgi-bin/mirna_entry.pl?acc=novel_miRNA_CCGGUCUGCUCGUCCC

## Sheet: TR-DS_down-regulated
mature miRNA	logFC	miRBase link
novel_miRNA_UCGGUAAUGAUUUUGUGGAGUC	-4.3515	https://www.mirbase.org/cgi-bin/mirna_entry.pl?acc=novel_miRNA_UCGGUAAUGAUUUUGUGGAGUC
novel_miRNA_UAGGAAUUACAAAAAAGAGAG	-3.49513	https://www.mirbase.org/cgi-bin/mirna_entry.pl?acc=novel_miRNA_UAGGAAUUACAAAAAAGAGAG
qrb-miR166b	-2.00268	https://www.mirbase.org/cgi-bin/mirna_entry.pl?acc=qrb-miR166b
qrb-miR171e	-1.86706	https://www.mirbase.org/cgi-bin/mirna_entry.pl?acc=qrb-miR171e
novel_miRNA_UCGCCAAGGAGAUUUGCUCUG	-1.4858	https://www.mirbase.org/cgi-bin/mirna_entry.pl?acc=novel_miRNA_UCGCCAAGGAGAUUUGCUCUG
novel_miRNA_UUUUAAGAACUCUAUAGGAUC	-1.37947	https://www.mirbase.org/cgi-bin/mirna_entry.pl?acc=novel_miRNA_UUUUAAGAACUCUAUAGGAUC
qrb-miR171c	-1.35582	https://www.mirbase.org/cgi-bin/mirna_entry.pl?acc=qrb-miR171c
qrb-miR164c	-1.2165	https://www.mirbase.org/cgi-bin/mirna_entry.pl?acc=qrb-miR164c
qrb-miR319a	-0.959891	https://www.mirbase.org/cgi-bin/mirna_entry.pl?acc=qrb-miR319a
qrb-miR395e	-0.871162	https://www.mirbase.org/cgi-bin/mirna_entry.pl?acc=qrb-miR395e
qrb-miR396b	-0.864954	https://www.mirbase.org/cgi-bin/mirna_entry.pl?acc=qrb-miR396b
novel_miRNA_CUUCUGUUAGCUCUUAUGGA_1	-0.835644	https://www.mirbase.org/cgi-bin/mirna_entry.pl?acc=novel_miRNA_CUUCUGUUAGCUCUUAUGGA_1
qrb-miR535a	-0.700072	https://www.mirbase.org/cgi-bin/mirna_entry.pl?acc=qrb-miR535a
novel_miRNA_UUAGAUUCACGCACAAACUCU	-0.652742	https://www.mirbase.org/cgi-bin/mirna_entry.pl?acc=novel_miRNA_UUAGAUUCACGCACAAACUCU
novel_miRNA_UCGGUAAUGAUUUUCUGGAGUC	-0.625084	https://www.mirbase.org/cgi-bin/mirna_entry.pl?acc=novel_miRNA_UCGGUAAUGAUUUUCUGGAGUC
novel_miRNA_AAAUGGGUGCGUUGGCAAGAAG	-0.546154	https://www.mirbase.org/cgi-bin/mirna_entry.pl?acc=novel_miRNA_AAAUGGGUGCGUUGGCAAGAAG
novel_miRNA_CGCAGAUUAGCGUGGCACCAUC	-0.474468	https://www.mirbase.org/cgi-bin/mirna_entry.pl?acc=novel_miRNA_CGCAGAUUAGCGUGGCACCAUC
qrb-miR171a	-0.458869	https://www.mirbase.org/cgi-bin/mirna_entry.pl?acc=qrb-miR171a
novel_miRNA_UUGCCGAAUCCGCCCAUUCCUA	-0.42053	https://www.mirbase.org/cgi-bin/mirna_entry.pl?acc=novel_miRNA_UUGCCGAAUCCGCCCAUUCCUA
qrb-miR166e	-0.39016	https://www.mirbase.org/cgi-bin/mirna_entry.pl?acc=qrb-miR166e
novel_miRNA_UUUGGAAACGCACUUGAAUCG	-0.382487	https://www.mirbase.org/cgi-bin/mirna_entry.pl?acc=novel_miRNA_UUUGGAAACGCACUUGAAUCG
novel_miRNA_AGUGGAAGGAUUGGAAAGACA	-0.295828	https://www.mirbase.org/cgi-bin/mirna_entry.pl?acc=novel_miRNA_AGUGGAAGGAUUGGAAAGACA
novel_miRNA_UUCAAGUGGCUUAGAGAUAGU	-0.280563	https://www.mirbase.org/cgi-bin/mirna_entry.pl?acc=novel_miRNA_UUCAAGUGGCUUAGAGAUAGU
novel_miRNA_UAGCCAAGGAUGACUUACCUG	-0.195374	https://www.mirbase.org/cgi-bin/mirna_entry.pl?acc=novel_miRNA_UAGCCAAGGAUGACUUACCUG
qrb-miR390b	-0.144233	https://www.mirbase.org/cgi-bin/mirna_entry.pl?acc=qrb-miR390b
qrb-miR159a	-0.129397	https://www.mirbase.org/cgi-bin/mirna_entry.pl?acc=qrb-miR159a
novel_miRNA_CGUGAUAUUGGUUCGGCUCUUC	-0.101848	https://www.mirbase.org/cgi-bin/mirna_entry.pl?acc=novel_miRNA_CGUGAUAUUGGUUCGGCUCUUC
novel_miRNA_ACUAUUGUGGAGCACCUGCUC	-0.0806333	https://www.mirbase.org/cgi-bin/mirna_entry.pl?acc=novel_miRNA_ACUAUUGUGGAGCACCUGCUC
qrb-miR168a	-0.076146	https://www.mirbase.org/cgi-bin/mirna_entry.pl?acc=qrb-miR168a

## Sheet: LR-DS_up-regulated
mature miRNA	logFC	miRBase link
qrb-miR171d	4.47508	https://www.mirbase.org/cgi-bin/mirna_entry.pl?acc=qrb-miR171d
qrb-miR393a	4.12651	https://www.mirbase.org/cgi-bin/mirna_entry.pl?acc=qrb-miR393a
qrb-miR166c	2.50053	https://www.mirbase.org/cgi-bin/mirna_entry.pl?acc=qrb-miR166c
novel_miRNA_CCGGUCUGCUCGUCCC	2.01601	https://www.mirbase.org/cgi-bin/mirna_entry.pl?acc=novel_miRNA_CCGGUCUGCUCGUCCC
novel_miRNA_UGUGGACUUGUUGUGCAAAUA	1.73682	https://www.mirbase.org/cgi-bin/mirna_entry.pl?acc=novel_miRNA_UGUGGACUUGUUGUGCAAAUA
qrb-miR162a	1.73128	https://www.mirbase.org/cgi-bin/mirna_entry.pl?acc=qrb-miR162a
qrb-miR166a	1.36331	https://www.mirbase.org/cgi-bin/mirna_entry.pl?acc=qrb-miR166a
qrb-miR160b	1.25036	https://www.mirbase.org/cgi-bin/mirna_entry.pl?acc=qrb-miR160b
qrb-miR167b	1.17904	https://www.mirbase.org/cgi-bin/mirna_entry.pl?acc=qrb-miR167b
novel_miRNA_CGCAGAUUAGCGUGGCACCAUC	1.14922	https://www.mirbase.org/cgi-bin/mirna_entry.pl?acc=novel_miRNA_CGCAGAUUAGCGUGGCACCAUC
novel_miRNA_UAGGAGUUGGAUGAGACAUUG	1.11334	https://www.mirbase.org/cgi-bin/mirna_entry.pl?acc=novel_miRNA_UAGGAGUUGGAUGAGACAUUG
qrb-miR171a	0.826484	https://www.mirbase.org/cgi-bin/mirna_entry.pl?acc=qrb-miR171a
qrb-miR166d	0.76381	https://www.mirbase.org/cgi-bin/mirna_entry.pl?acc=qrb-miR166d
qrb-miR156b	0.568818	https://www.mirbase.org/cgi-bin/mirna_entry.pl?acc=qrb-miR156b
novel_miRNA_CUUCUGUUAGCUCUUAUGGA_1	0.526842	https://www.mirbase.org/cgi-bin/mirna_entry.pl?acc=novel_miRNA_CUUCUGUUAGCUCUUAUGGA_1
qrb-miR157a	0.49937	https://www.mirbase.org/cgi-bin/mirna_entry.pl?acc=qrb-miR157a
novel_miRNA_UCUGUCGUGGGAGAGAUGACGC	0.403469	https://www.mirbase.org/cgi-bin/mirna_entry.pl?acc=novel_miRNA_UCUGUCGUGGGAGAGAUGACGC
qrb-miR160c	0.379534	https://www.mirbase.org/cgi-bin/mirna_entry.pl?acc=qrb-miR160c
qrb-miR398a	0.300376	https://www.mirbase.org/cgi-bin/mirna_entry.pl?acc=qrb-miR398a
qrb-miR171b	0.246279	https://www.mirbase.org/cgi-bin/mirna_entry.pl?acc=qrb-miR171b
novel_miRNA_ACCGUGUUUCUCUGUAUAACG	0.161267	https://www.mirbase.org/cgi-bin/mirna_entry.pl?acc=novel_miRNA_ACCGUGUUUCUCUGUAUAACG
qrb-miR403a	0.126458	https://www.mirbase.org/cgi-bin/mirna_entry.pl?acc=qrb-miR403a
qrb-miR166e	0.119542	https://www.mirbase.org/cgi-bin/mirna_entry.pl?acc=qrb-miR166e
qrb-miR396c	0.0506257	https://www.mirbase.org/cgi-bin/mirna_entry.pl?acc=qrb-miR396c

## Sheet: LR-DS_down-regulated
mature miRNA	logFC	miRBase_link
qrb-miR156a	-9.10798	https://www.mirbase.org/cgi-bin/mirna_entry.pl?acc=qrb-miR156a
novel_miRNA_ACUAUUGUGGAGCACCUGCUC	-5.80981	https://www.mirbase.org/cgi-bin/mirna_entry.pl?acc=novel_miRNA_ACUAUUGUGGAGCACCUGCUC
novel_miRNA_UUUCAGAAUGAGAGGCAAGUC	-4.08479	https://www.mirbase.org/cgi-bin/mirna_entry.pl?acc=novel_miRNA_UUUCAGAAUGAGAGGCAAGUC
novel_miRNA_UCGGUAAUGAUUUUGUGGAGUC	-3.98662	https://www.mirbase.org/cgi-bin/mirna_entry.pl?acc=novel_miRNA_UCGGUAAUGAUUUUGUGGAGUC
novel_miRNA_CUUCUGUUAGCUCUUAUGGA_2	-3.90597	https://www.mirbase.org/cgi-bin/mirna_entry.pl?acc=novel_miRNA_CUUCUGUUAGCUCUUAUGGA_2
qrb-miR166f	-3.66243	https://www.mirbase.org/cgi-bin/mirna_entry.pl?acc=qrb-miR166f
novel_miRNA_UUUUAAGAACUCUAUAGGAUC	-2.62659	https://www.mirbase.org/cgi-bin/mirna_entry.pl?acc=novel_miRNA_UUUUAAGAACUCUAUAGGAUC
novel_miRNA_UUAGAUUCACGCACAAACUCU	-2.29576	https://www.mirbase.org/cgi-bin/mirna_entry.pl?acc=novel_miRNA_UUAGAUUCACGCACAAACUCU
qrb-miR171c	-2.08006	https://www.mirbase.org/cgi-bin/mirna_entry.pl?acc=qrb-miR171c
qrb-miR395e	-1.99245	https://www.mirbase.org/cgi-bin/mirna_entry.pl?acc=qrb-miR395e
novel_miRNA_UUAGUCCAAGACUCGGCCACA	-1.92823	https://www.mirbase.org/cgi-bin/mirna_entry.pl?acc=novel_miRNA_UUAGUCCAAGACUCGGCCACA
qrb-miR396b	-1.82498	https://www.mirbase.org/cgi-bin/mirna_entry.pl?acc=qrb-miR396b
qrb-miR319a	-1.72851	https://www.mirbase.org/cgi-bin/mirna_entry.pl?acc=qrb-miR319a
qrb-miR159a	-1.71301	https://www.mirbase.org/cgi-bin/mirna_entry.pl?acc=qrb-miR159a
novel_miRNA_UCGGUAAUGAUUUUCUGGAGUC	-1.58845	https://www.mirbase.org/cgi-bin/mirna_entry.pl?acc=novel_miRNA_UCGGUAAUGAUUUUCUGGAGUC
novel_miRNA_CGUGAUAUUGGUUCGGCUCUUC	-1.57032	https://www.mirbase.org/cgi-bin/mirna_entry.pl?acc=novel_miRNA_CGUGAUAUUGGUUCGGCUCUUC
novel_miRNA_UUGCCGAAUCCGCCCAUUCCUA	-1.54423	https://www.mirbase.org/cgi-bin/mirna_entry.pl?acc=novel_miRNA_UUGCCGAAUCCGCCCAUUCCUA
novel_miRNA_UAGGAAUUACAAAAAAGAGAG	-1.51476	https://www.mirbase.org/cgi-bin/mirna_entry.pl?acc=novel_miRNA_UAGGAAUUACAAAAAAGAGAG
qrb-miR171e	-1.47257	https://www.mirbase.org/cgi-bin/mirna_entry.pl?acc=qrb-miR171e
novel_miRNA_UUUGGAAACGCACUUGAAUCG	-1.43018	https://www.mirbase.org/cgi-bin/mirna_entry.pl?acc=novel_miRNA_UUUGGAAACGCACUUGAAUCG
qrb-miR172a	-1.39953	https://www.mirbase.org/cgi-bin/mirna_entry.pl?acc=qrb-miR172a
novel_miRNA_UCGCCAAGGAGAUUUGCUCUG	-1.29325	https://www.mirbase.org/cgi-bin/mirna_entry.pl?acc=novel_miRNA_UCGCCAAGGAGAUUUGCUCUG
qrb-miR390a	-1.27078	https://www.mirbase.org/cgi-bin/mirna_entry.pl?acc=qrb-miR390a
novel_miRNA_UAGCCAAGGAUGACUUACCUG	-1.12331	https://www.mirbase.org/cgi-bin/mirna_entry.pl?acc=novel_miRNA_UAGCCAAGGAUGACUUACCUG
novel_miRNA_AAAUGGGUGCGUUGGCAAGAAG	-1.12085	https://www.mirbase.org/cgi-bin/mirna_entry.pl?acc=novel_miRNA_AAAUGGGUGCGUUGGCAAGAAG
qrb-miR396a	-1.08925	https://www.mirbase.org/cgi-bin/mirna_entry.pl?acc=qrb-miR396a
qrb-miR167a	-1.01669	https://www.mirbase.org/cgi-bin/mirna_entry.pl?acc=qrb-miR167a
qrb-miR168a	-1.01639	https://www.mirbase.org/cgi-bin/mirna_entry.pl?acc=qrb-miR168a
qrb-miR166b	-0.987839	https://www.mirbase.org/cgi-bin/mirna_entry.pl?acc=qrb-miR166b
novel_miRNA_UUCAAGUGGCUUAGAGAUAGU	-0.812061	https://www.mirbase.org/cgi-bin/mirna_entry.pl?acc=novel_miRNA_UUCAAGUGGCUUAGAGAUAGU
qrb-miR408a	-0.482738	https://www.mirbase.org/cgi-bin/mirna_entry.pl?acc=qrb-miR408a
qrb-miR535a	-0.462541	https://www.mirbase.org/cgi-bin/mirna_entry.pl?acc=qrb-miR535a
qrb-miR390b	-0.379935	https://www.mirbase.org/cgi-bin/mirna_entry.pl?acc=qrb-miR390b
qrb-miR164d	-0.284861	https://www.mirbase.org/cgi-bin/mirna_entry.pl?acc=qrb-miR164d
qrb-miR164c	-0.191637	https://www.mirbase.org/cgi-bin/mirna_entry.pl?acc=qrb-miR164c
novel_miRNA_AGUGGAAGGAUUGGAAAGACA	-0.16886	https://www.mirbase.org/cgi-bin/mirna_entry.pl?acc=novel_miRNA_AGUGGAAGGAUUGGAAAGACA
qrb-miR398b	-0.00209976	https://www.mirbase.org/cgi-bin/mirna_entry.pl?acc=qrb-miR398b

## Sheet: Comparison 
	logFC
mature miNA	TR-DS.	LR-DS.
qrb-miR172a	6.29345	-1.39953
qrb-miR408a	1.00991	-0.482738
qrb-miR396a	0.5568	-1.08925
qrb-miR390a	0.400501	-1.27078
qrb-miR167a	0.248796	-1.01669
novel_miRNA_UUAGUCCAAGACUCGGCCACA	0.16882	-1.92823
novel_miRNA_UUUCAGAAUGAGAGGCAAGUC	0.100808	-4.08479
qrb-miR398b	0.0802086	-0.00209976
qrb-miR164d	0.0761467	-0.284861
	logFC
mature miNA	TR-DS.	LR-DS.
novel_miRNA_CUUCUGUUAGCUCUUAUGGA_1	-0.835644	0.526842
novel_miRNA_CGCAGAUUAGCGUGGCACCAUC	-0.474468	1.14922
qrb-miR171a	-0.458869	0.826484
qrb-miR166e	-0.39016	0.119542
	logFC
mature miNA	TR-DS.	LR-DS.
qrb-miR166d	1.59386	0.76381
qrb-miR166a	1.39517	1.36331
qrb-miR171d	1.31681	4.47508
qrb-miR393a	1.15787	4.12651
qrb-miR160b	1.05955	1.25036
qrb-miR167b	1.04605	1.17904
qrb-miR403a	0.83604	0.126458
qrb-miR162a	0.824291	1.73128
novel_miRNA_UAGGAGUUGGAUGAGACAUUG	0.695915	1.11334
qrb-miR398a	0.670258	0.300376
qrb-miR396c	0.608478	0.0506257
novel_miRNA_UGUGGACUUGUUGUGCAAAUA	0.572123	1.73682
qrb-miR156b	0.497226	0.568818
qrb-miR157a	0.407354	0.49937
qrb-miR171b	0.261354	0.246279
novel_miRNA_UCUGUCGUGGGAGAGAUGACGC	0.248347	0.403469
novel_miRNA_ACCGUGUUUCUCUGUAUAACG	0.211476	0.161267
qrb-miR166c	0.187294	2.50053
novel_miRNA_CCGGUCUGCUCGUCCC	0.0617369	2.01601
	logFC
mature miNA	TR-DS.	LR-DS.
novel_miRNA_UCGGUAAUGAUUUUGUGGAGUC	-4.3515	-3.98662
novel_miRNA_UAGGAAUUACAAAAAAGAGAG	-3.49513	-1.51476
qrb-miR166b	-2.00268	-0.987839
qrb-miR171e	-1.86706	-1.47257
novel_miRNA_UCGCCAAGGAGAUUUGCUCUG	-1.4858	-1.29325
novel_miRNA_UUUUAAGAACUCUAUAGGAUC	-1.37947	-2.62659
qrb-miR171c	-1.35582	-2.08006
qrb-miR164c	-1.2165	-0.191637
qrb-miR319a	-0.959891	-1.72851
qrb-miR395e	-0.871162	-1.99245
qrb-miR396b	-0.864954	-1.82498
qrb-miR535a	-0.700072	-0.462541
novel_miRNA_UUAGAUUCACGCACAAACUCU	-0.652742	-2.29576
novel_miRNA_UCGGUAAUGAUUUUCUGGAGUC	-0.625084	-1.58845
novel_miRNA_AAAUGGGUGCGUUGGCAAGAAG	-0.546154	-1.12085
novel_miRNA_UUGCCGAAUCCGCCCAUUCCUA	-0.42053	-1.54423
novel_miRNA_UUUGGAAACGCACUUGAAUCG	-0.382487	-1.43018
novel_miRNA_AGUGGAAGGAUUGGAAAGACA	-0.295828	-0.16886
novel_miRNA_UUCAAGUGGCUUAGAGAUAGU	-0.280563	-0.812061
novel_miRNA_UAGCCAAGGAUGACUUACCUG	-0.195374	-1.12331
qrb-miR390b	-0.144233	-0.379935
qrb-miR159a	-0.129397	-1.71301
novel_miRNA_CGUGAUAUUGGUUCGGCUCUUC	-0.101848	-1.57032
novel_miRNA_ACUAUUGUGGAGCACCUGCUC	-0.0806333	-5.80981
qrb-miR168a	-0.076146	-1.01639
