# Supplementary material for: Oaks drought-induced responses under root types: gene and microRNA cooperation
Source: BMC Plant Biol. 2025 Oct 1;25:1262. doi: 10.1186/s12870-025-07402-z (PMC12490147; doi:10.1186/s12870-025-07402-z)
Supplement: Supplementary file 7 — Supplementary Material 7. [file 12870_2025_7402_MOESM7_ESM.xlsx]

## Sheet: Arkusz1
Gene	Gene ID	Primer	Sequence (5’ → 3’)
NCER1	Qrob_T0319380.2	forward	TTGCTGCTGGAACAACAGAT
		reverse	TTCCCTTGTCATCTCCTTGC
WRKY	Qrob_T0408800.2	forward	CCCACGCTACCAATTTGATT
		reverse	TGCTGTTGTTGTTGTGTTTCTG
GST	Qrob_T0215460.2	forward	TGAATCTAGGGCAATTACAGCA
		reverse	GAGATCAGTTCCAGTTTCCTTGA
PIN2	Qrob_T0064480.2	forward	TCTTCACACCAGACCAGTGC
		reverse	GGAAGGAAAGTAATGGAACTGC
GERL1	Qrob_T0594290.2	forward	CCAACCCTCCCATTAATCCT
		reverse	CTCTTCAACCACATTTTTGTCG
ACO5	Qrob_T0262840.2	forward	CGGCAAGTTGGAGAATGTG
		reverse	GCTGGCCACTCGTTATTGTC
AIR1	Qrob_T0154220.2	forward	CCACCTCCACCTGTGAAGAC
		reverse	AGGTGGTGGTGGTGCATAAG
HK1	Qrob_T0178520.2	forward	TGAGGAGAAGTGTGGGACCC
		reverse	GCGTGCATCTCCTGAGTCAT
EF	Qrob_T0308710.2	forward	CACCTCTTGGTCGTTTTGCT
		reverse	TTCTCAACACTCTTGATGACACC
