# Supplementary material for: Oaks drought-induced responses under root types: gene and microRNA cooperation
Source: BMC Plant Biol. 2025 Oct 1;25:1262. doi: 10.1186/s12870-025-07402-z (PMC12490147; doi:10.1186/s12870-025-07402-z)
Supplement: Supplementary file 8 — Supplementary Material 8. [file 12870_2025_7402_MOESM8_ESM.xlsx]

## Sheet: Comparison TR-DS vs. LR-DS
	logFC
mature miNA	TR-DS.	LR-DS.
qrb-miR172a	6.29345	-1.39953
qrb-miR408a	1.00991	-0.482738
qrb-miR396a	0.5568	-1.08925
qrb-miR390a	0.400501	-1.27078
qrb-miR167a	0.248796	-1.01669
novel_miRNA_UUAGUCCAAGACUCGGCCACA	0.16882	-1.92823
novel_miRNA_UUUCAGAAUGAGAGGCAAGUC	0.100808	-4.08479
qrb-miR398b	0.0802086	-0.00209976
qrb-miR164d	0.0761467	-0.284861
	logFC
mature miNA	TR-DS.	LR-DS.
novel_miRNA_CUUCUGUUAGCUCUUAUGGA_1	-0.835644	0.526842
novel_miRNA_CGCAGAUUAGCGUGGCACCAUC	-0.474468	1.14922
qrb-miR171a	-0.458869	0.826484
qrb-miR166e	-0.39016	0.119542
	logFC
mature miNA	TR-DS.	LR-DS.
qrb-miR166d	1.59386	0.76381
qrb-miR166a	1.39517	1.36331
qrb-miR171d	1.31681	4.47508
qrb-miR393a	1.15787	4.12651
qrb-miR160b	1.05955	1.25036
qrb-miR167b	1.04605	1.17904
qrb-miR403a	0.83604	0.126458
qrb-miR162a	0.824291	1.73128
novel_miRNA_UAGGAGUUGGAUGAGACAUUG	0.695915	1.11334
qrb-miR398a	0.670258	0.300376
qrb-miR396c	0.608478	0.0506257
novel_miRNA_UGUGGACUUGUUGUGCAAAUA	0.572123	1.73682
qrb-miR156b	0.497226	0.568818
qrb-miR157a	0.407354	0.49937
qrb-miR171b	0.261354	0.246279
novel_miRNA_UCUGUCGUGGGAGAGAUGACGC	0.248347	0.403469
novel_miRNA_ACCGUGUUUCUCUGUAUAACG	0.211476	0.161267
qrb-miR166c	0.187294	2.50053
novel_miRNA_CCGGUCUGCUCGUCCC	0.0617369	2.01601
	logFC
mature miNA	TR-DS.	LR-DS.
novel_miRNA_UCGGUAAUGAUUUUGUGGAGUC	-4.3515	-3.98662
novel_miRNA_UAGGAAUUACAAAAAAGAGAG	-3.49513	-1.51476
qrb-miR166b	-2.00268	-0.987839
qrb-miR171e	-1.86706	-1.47257
novel_miRNA_UCGCCAAGGAGAUUUGCUCUG	-1.4858	-1.29325
novel_miRNA_UUUUAAGAACUCUAUAGGAUC	-1.37947	-2.62659
qrb-miR171c	-1.35582	-2.08006
qrb-miR164c	-1.2165	-0.191637
qrb-miR319a	-0.959891	-1.72851
qrb-miR395e	-0.871162	-1.99245
qrb-miR396b	-0.864954	-1.82498
qrb-miR535a	-0.700072	-0.462541
novel_miRNA_UUAGAUUCACGCACAAACUCU	-0.652742	-2.29576
novel_miRNA_UCGGUAAUGAUUUUCUGGAGUC	-0.625084	-1.58845
novel_miRNA_AAAUGGGUGCGUUGGCAAGAAG	-0.546154	-1.12085
novel_miRNA_UUGCCGAAUCCGCCCAUUCCUA	-0.42053	-1.54423
novel_miRNA_UUUGGAAACGCACUUGAAUCG	-0.382487	-1.43018
novel_miRNA_AGUGGAAGGAUUGGAAAGACA	-0.295828	-0.16886
novel_miRNA_UUCAAGUGGCUUAGAGAUAGU	-0.280563	-0.812061
novel_miRNA_UAGCCAAGGAUGACUUACCUG	-0.195374	-1.12331
qrb-miR390b	-0.144233	-0.379935
qrb-miR159a	-0.129397	-1.71301
novel_miRNA_CGUGAUAUUGGUUCGGCUCUUC	-0.101848	-1.57032
novel_miRNA_ACUAUUGUGGAGCACCUGCUC	-0.0806333	-5.80981
qrb-miR168a	-0.076146	-1.01639
