# Supplementary material for: Oaks drought-induced responses under root types: gene and microRNA cooperation
Source: BMC Plant Biol. 2025 Oct 1;25:1262. doi: 10.1186/s12870-025-07402-z (PMC12490147; doi:10.1186/s12870-025-07402-z)
Supplement: Supplementary file 9 — Supplementary Material 9. [file 12870_2025_7402_MOESM9_ESM.xlsx]

## Sheet: Sheet1
Sample	CT1(number)	CT1(ratio)	CT2(number)	CT2(ratio)	CT3(number)	CT3(ratio)	DS1(number)	DS1(ratio)	DS2(number)	DS2(ratio)	DS3(number)	DS3(ratio)
Raw Reads	10841660	/	11775645	/	10460321	/	12025901	/	15587083	/	21091681	/
Unique Raw Reads	5576083	/	5696695	/	5233132	/	6570230	/	7909241	/	10272566	/
reads < 15nt after removing 3 adaptor	74571	0.69%	78999	0.67%	71341	0.68%	130524	1.09%	180382	1.16%	240371	1.14%
Mappable Reads	10767089	99.31%	11696646	99.33%	10388980	99.32%	11895377	98.91%	15406701	98.84%	20851310	98.86%
Unique reads < 15nt after removing 3 adaptor	32919	0.59%	33588	0.59%	30774	0.59%	42649	0.65%	52226	0.66%	65261	0.64%
Unique Mappable Reads	5543164	99.41%	5663107	99.41%	5202358	99.41%	6527581	99.35%	7857015	99.34%	10207305	99.36%
Mapped Reads	3890571	35.89%	4181894	35.51%	3818144	36.50%	3911339	32.52%	5100381	32.72%	6849332	32.47%
Unique Mapped Reads	1684797	30.21%	1662920	29.19%	1607306	30.71%	1704070	25.94%	2025018	25.60%	2505945	24.39%
Number of input Transcript	25808	/	25808	/	25808	/	25808	/	25808	/	25808	/
Number of Coverd Transcript	19971	77.38%	19960	77.34%	19901	77.11%	19676	76.24%	19986	77.44%	20427	79.15%
