# Supplementary material for: Oaks drought-induced responses under root types: gene and microRNA cooperation
Source: BMC Plant Biol. 2025 Oct 1;25:1262. doi: 10.1186/s12870-025-07402-z (PMC12490147; doi:10.1186/s12870-025-07402-z)
Supplement: Supplementary file 10 — Supplementary Material 10. [file 12870_2025_7402_MOESM10_ESM.xlsx]

## Sheet: CT1_out
SiteID	Query	Transcript	TStart	TStop	TSlice	MFEperfect	MFEsite	MFEratio	AllenScore	Paired	Unpaired	Structure	Sequence	DegradomeCategory	DegradomePval
Qrob_T0007810.2:89	novel_miRNA_UUGCCGAAUCCGCCCAUUCCUA	Qrob_T0007810.2	77	98	89	-42.80	-33.40	0.780373831775701	6.5	1-7,98-92;9-20,90-79	8-8,91-91[SIL];21-22,78-77[UP3]	..((((((((((((.(((((((&))))))).))))))))))))..	GUGGGAUGGGUGGAAUUGGCAA&UUGCCGAAUCCGCCCAUUCCUA	1	0.0138250600885357
Qrob_T0026800.2:637	qrb-miR396	Qrob_T0026800.2	626	647	637	-36.60	-30.50	0.833333333333333	4	1-6,647-642;7-19,640-628	x-x,641-641[BULt];20-21,627-626[UP3]	..(((((((((((((.((((((&))))))-)))))))))))))..	CCGUUCAAGAAAGCCUGUGGAA&UUCCAC-GGCUUUCUUGAACUG	0	0.00165071351824797
Qrob_T0088850.2:1215	qrb-miR396	Qrob_T0088850.2	1204	1225	1215	-36.60	-30.70	0.83879781420765	4	1-6,1225-1220;7-19,1218-1206	x-x,1219-1219[BULt];20-21,1205-1204[UP3]	..(((((((((((((.((((((&))))))-)))))))))))))..	CCGUUCAAGAAAGCCUGUGGAA&UUCCAC-GGCUUUCUUGAACUG	2	0.0403142691393503
Qrob_T0122500.2:970	qrb-miR159	Qrob_T0122500.2	959	979	970	-36.50	-32.80	0.898630136986301	3.5	2-6,978-974;8-21,972-959	1-1,979-979[UP5];7-7,973-973[SIL]	((((((((((((((.(((((.&.))))).))))))))))))))	UGGAGCUCCCUUCACUCCAAU&UUUGGAUUGAAGGGAGCUCUA	1	0.000497073427761729
Qrob_T0162660.2:1923	qrb-miR172	Qrob_T0162660.2	1912	1932	1923	-34.30	-34.20	0.997084548104956	2	1-20,1932-1913	21-21,1912-1912[UP3]	.((((((((((((((((((((&)))))))))))))))))))).	CUGCAGCAUCAUCAGGAUUCU&AGAAUCUUGAUGAUGCUGCAU	0	0.000990755345698369
Qrob_T0190770.2:2552	qrb-miR167	Qrob_T0190770.2	2541	2561	2552	-38.90	-31.00	0.796915167095116	5	3-13,2559-2549;15-20,2547-2542	1-2,2561-2560[UP5];14-14,2548-2548[SIL];21-21,2541-2541[UP3]	.((((((.(((((((((((..&..))))))))))).)))))).	GAGAUCAGGCUGGCAGCUUGU&UGAAGCUGCCAGCAUGAUCUA	0	0.00132078894707333
Qrob_T0191150.2:150	qrb-miR156	Qrob_T0191150.2	142	159	150	-32.90	-31.00	0.942249240121581	1	1-17,159-143	18-18,142-142[UP3]	.(((((((((((((((((&))))))))))))))))).	CCUCACUCUCUUCUGUCA&UGACAGAAGAGAGUGAGC	2	0.0136228284534123
Qrob_T0267250.2:1633	novel_miRNA_CGUGAUAUUGGUUCGGCUCUUC	Qrob_T0267250.2	1621	1642	1633	-39.30	-29.20	0.743002544529262	7	1-6,1642-1637;9-14,1634-1629;16-21,1627-1622	7-8,1636-1635[SIL];15-15,1628-1628[SIL];22-22,1621-1621[UP3]	.((((((.((((((..((((((&))))))..)))))).)))))).	AGAGAGCGGGACCAUGAUCACG&CGUGAUAUUGGUUCGGCUCUUC	4	0.0478797901580921
Qrob_T0283280.2:356	qrb-miR396	Qrob_T0283280.2	345	365	356	-40.10	-27.20	0.678304239401496	9	1-4,365-362;7-18,359-348	5-6,361-360[SIL];19-21,347-345[UP3]	...((((((((((((..((((&))))..))))))))))))...	GUGCCCACAGUUUUUGAGAGC&GCUCAAGAAAGCUGUGGGAGA	1	0.0192038933549636
Qrob_T0323550.2:1034	novel_miRNA_UUAGUCCAAGACUCGGCCACA	Qrob_T0323550.2	1023	1043	1034	-40.20	-38.80	0.965174129353234	0.5	1-21,1043-1023	NA	(((((((((((((((((((((&)))))))))))))))))))))	UGUGGUCGAGUCUUGGACUAA&UUAGUCCAAGACUCGGCCACA	0	0.000330360908210814
Qrob_T0323590.2:2240	qrb-miR164	Qrob_T0323590.2	2229	2249	2240	-42.20	-29.90	0.708530805687204	7	1-5,2249-2245;7-20,2243-2230	6-6,2244-2244[SIL];21-21,2229-2229[UP3]	.((((((((((((((.(((((&))))).)))))))))))))).	UUUGGGGAGUUGGAGGACGUG&CAUGUGCUCUAGCUCUCCAGC	0	0.0131296635690801
Qrob_T0323770.2:954	novel_miRNA_UUAGUCCAAGACUCGGCCACA	Qrob_T0323770.2	943	963	954	-40.20	-36.80	0.915422885572139	1	1-21,963-943	NA	(((((((((((((((((((((&)))))))))))))))))))))	UGUGGUUGAGUCUUGGACUAA&UUAGUCCAAGACUCGGCCACA	0	0.00165071351824797
Qrob_T0327960.2:1388	qrb-miR160	Qrob_T0327960.2	1377	1397	1388	-45.20	-42.00	0.929203539823009	1	1-14,1397-1384;16-21,1382-1377	15-15,1383-1383[SIL]	((((((.((((((((((((((&)))))))))))))).))))))	UGGCAUGCAGGGAGCCAGGCA&UGCCUGGCUCCCUGAAUGCCA	2	0.0136228284534123
Qrob_T0332840.2:504	qrb-miR156	Qrob_T0332840.2	496	513	504	-33.70	-29.40	0.87240356083086	2	2-13,512-501;15-18,499-496	1-1,513-513[UP5];14-14,500-500[SIL]	((((.((((((((((((.&.)))))))))))).))))	GCUCUCUCUCUUCUGUCA&CGACAGAAGAGAGUGAGC	1	0.00149047916012535
Qrob_T0332840.2:505	qrb-miR157	Qrob_T0332840.2	496	514	505	-32.00	-29.20	0.9125	2	1-11,514-504;13-19,502-496	12-12,503-503[SIL]	(((((((.(((((((((((&))))))))))).)))))))	GCUCUCUCUCUUCUGUCAA&UUGACAGAAGAUAGAGAGC	1	0.000993899773530815
Qrob_T0343720.2:1302	qrb-miR156	Qrob_T0343720.2	1294	1311	1302	-33.70	-29.40	0.87240356083086	2	2-13,1310-1299;15-18,1297-1294	1-1,1311-1311[UP5];14-14,1298-1298[SIL]	((((.((((((((((((.&.)))))))))))).))))	GCUCUCUCUCUUCUGUCA&CGACAGAAGAGAGUGAGC	0	0.00132078894707333
Qrob_T0347580.2:668	novel_miRNA_UUGCCGAAUCCGCCCAUUCCUA	Qrob_T0347580.2	656	677	668	-42.80	-33.50	0.782710280373832	6.5	1-7,677-671;9-20,669-658	8-8,670-670[SIL];21-22,657-656[UP3]	..((((((((((((.(((((((&))))))).))))))))))))..	GUGGGAUGGGUGGAAUCGGUAA&UUGCCGAAUCCGCCCAUUCCUA	0	0.0085540072216207
Qrob_T0349780.2:476	qrb-miR408	Qrob_T0349780.2	465	485	476	-45.30	-34.50	0.76158940397351	6	3-21,483-465	1-2,485-484[UP5]	(((((((((((((((((((..&..)))))))))))))))))))	CCGUGUUCUGCCUGUUCUUAU&CGGGGAACAGGCAGAGCAUGG	4	0.0242335269943387
Qrob_T0357230.2:1695	qrb-miR166	Qrob_T0357230.2	1684	1704	1695	-44.10	-37.90	0.859410430839002	3	2-19,1703-1686	1-1,1704-1704[UP5];20-21,1685-1684[UP3]	..((((((((((((((((((.&.))))))))))))))))))..	CUGGAAUGAAGCCUGGUCCGG&UCGGACCAGGCUUCAUUCCCC	0	0.000330360908210814
Qrob_T0357230.2:1697	qrb-miR166	Qrob_T0357230.2	1686	1705	1697	-42.00	-38.40	0.914285714285714	2	1-2,1705-1704;4-21,1703-1686	3-3,x-x[BULq]	((((((((((((((((((-((&)).))))))))))))))))))	GGAAUGAAGCCUGGUCCG-GA&UCUCGGACCAGGCUUCAUUCC	2	0.0136228284534123
Qrob_T0370790.2:1415	qrb-miR167	Qrob_T0370790.2	1404	1424	1415	-38.90	-31.90	0.820051413881748	4	3-13,1422-1412;15-21,1410-1404	1-2,1424-1423[UP5];14-14,1411-1411[SIL]	(((((((.(((((((((((..&..))))))))))).)))))))	UAGAUCAGGCUGGCAGCUUGU&UGAAGCUGCCAGCAUGAUCUA	4	0.0242335269943387
Qrob_T0402270.2:760	qrb-miR172	Qrob_T0402270.2	749	769	760	-34.30	-34.20	0.997084548104956	2	1-20,769-750	21-21,749-749[UP3]	.((((((((((((((((((((&)))))))))))))))))))).	CUGCAGCAUCAUCAGGAUUCU&AGAAUCUUGAUGAUGCUGCAU	2	0.0270600754517536
Qrob_T0415350.2:869	qrb-miR396	Qrob_T0415350.2	858	879	869	-36.60	-30.70	0.83879781420765	4	1-6,879-874;7-19,872-860	x-x,873-873[BULt];20-21,859-858[UP3]	..(((((((((((((.((((((&))))))-)))))))))))))..	GCGUUCAAGAAAGCCUGUGGAA&UUCCAC-GGCUUUCUUGAACUG	0	0.000660612678091921
Qrob_T0438850.2:2006	qrb-miR160	Qrob_T0438850.2	1995	2015	2006	-45.40	-45.90	1	1	1-20,2015-1996	21-21,1995-1995[UP3]	.((((((((((((((((((((&)))))))))))))))))))).	AGGCAUACAGGGAGCCAGGCA&UGCCUGGCUCCCUGUAUGCCA	0	0.000660612678091921
Qrob_T0458490.2:894	novel_miRNA_UUUUAAGAACUCUAUAGGAUC	Qrob_T0458490.2	880	903	894	-29.60	-24.80	0.837837837837838	8.5	2-12,902-892;13-21,888-880	1-1,903-903[UP5];x-x,891-889[BULt]	(((((((((...(((((((((((.&.)))))))))))---)))))))))	GAUCCUGUAACUGAGUUCUUGAAU&UUUUAAGAACUC---UAUAGGAUC	4	0.0478797901580921
Qrob_T0496000.2:280	qrb-miR171	Qrob_T0496000.2	267	289	280	-35.50	-23.80	0.670422535211268	7.5	3-12,287-278;13-21,276-268	1-2,289-288[UP5];x-x,277-277[BULt];22-22,267-267[UP3]	.(((((((((.((((((((((..&..))))))))))-))))))))).	CGGGGGCCAACAUCAAUAUCAGA&CGUGAUAUUGAU-UUGGCUCUUC	1	0.0418576706955676
Qrob_T0519660.2:938	novel_miRNA_UUAGUCCAAGACUCGGCCACA	Qrob_T0519660.2	927	947	938	-40.20	-26.90	0.669154228855721	4	2-13,946-935;15-16,933-932;18-20,930-928	1-1,947-947[UP5];14-14,934-934[SIL];17-17,931-931[SIL];21-21,927-927[UP3]	.(((.((.((((((((((((.&.)))))))))))).)).))).	CGUGUCCAAGUCUUGGACUAG&UUAGUCCAAGACUCGGCCACA	0	0.0439418166691663
Qrob_T0535990.2:1337	qrb-miR160	Qrob_T0535990.2	1326	1346	1337	-45.20	-41.20	0.911504424778761	2	1-14,1346-1333;16-20,1331-1327	15-15,1332-1332[SIL];21-21,1326-1326[UP3]	.(((((.((((((((((((((&)))))))))))))).))))).	AGGCAUACAGGGAGCCAGGCA&UGCCUGGCUCCCUGAAUGCCA	0	0.000660612678091921
Qrob_T0626770.2:2180	qrb-miR393	Qrob_T0626770.2	2168	2189	2180	-36.40	-33.30	0.914835164835165	4	1-18,2189-2172	19-22,2171-2168[UP3]	....((((((((((((((((((&))))))))))))))))))....	GAGACAAUGCGAUCCCUUUGGA&UCCAAAGGGAUCGCAUUGAUUU	2	0.0270600754517536
Qrob_T0633190.2:559	qrb-miR166	Qrob_T0633190.2	548	568	559	-44.10	-37.70	0.854875283446712	3.5	2-19,567-550	1-1,568-568[UP5];20-21,549-548[UP3]	..((((((((((((((((((.&.))))))))))))))))))..	CCGGGAUGAAGCCUGGUCCGG&UCGGACCAGGCUUCAUUCCCC	2	0.0270600754517536
Qrob_T0636470.2:1343	qrb-miR160	Qrob_T0636470.2	1332	1352	1343	-45.40	-42.30	0.931718061674009	2.5	1-19,1352-1334	20-21,1333-1332[UP3]	..(((((((((((((((((((&)))))))))))))))))))..	UAGCAUGCAGGGAGCCAGGCA&UGCCUGGCUCCCUGUAUGCCA	0	0.00132078894707333
Qrob_T0642710.2:967	qrb-miR159	Qrob_T0642710.2	956	976	967	-36.50	-32.80	0.898630136986301	3.5	2-6,975-971;8-21,969-956	1-1,976-976[UP5];7-7,970-970[SIL]	((((((((((((((.(((((.&.))))).))))))))))))))	UGGAGCUCCCUUCACUCCAAU&UUUGGAUUGAAGGGAGCUCUA	2	0.0270600754517536
Qrob_T0690090.2:954	qrb-miR319	Qrob_T0690090.2	943	963	954	-41.60	-28.80	0.692307692307692	7	1-4,963-960;6-10,958-954;12-20,951-943	5-5,959-959[SIL];11-11,953-952[AILt]	(((((((((..(((((.((((&)))).)))))-.)))))))))	GGGAGCUCUAUUUCAGGCCAA&UUGGACUGAA-GGGAGCUCCC	1	0.021639109602021
Qrob_T0712850.2:216	qrb-miR535	Qrob_T0712850.2	205	225	216	-38.00	-29.40	0.773684210526316	8.5	1-7,225-219;10-18,216-208	8-9,218-217[SIL];19-21,207-205[UP3]	...(((((((((..(((((((&)))))))..)))))))))...	GGCGACGACGAGUUCGGGCAC&GUGCUCGUUCUCGUUGUCAUG	3	0.0274956296835076
Qrob_T0749650.2:1321	qrb-miR172	Qrob_T0749650.2	1310	1330	1321	-34.30	-34.20	0.997084548104956	2	1-20,1330-1311	21-21,1310-1310[UP3]	.((((((((((((((((((((&)))))))))))))))))))).	UUGCAGCAUCAUCAGGAUUCU&AGAAUCUUGAUGAUGCUGCAU	2	0.0136228284534123
Qrob_T0759270.2:242	qrb-miR2111	Qrob_T0759270.2	231	251	242	-37.10	-32.40	0.873315363881402	3	1-18,251-234	19-21,233-231[UP3]	...((((((((((((((((((&))))))))))))))))))...	UGUACCUCAGGAUGCAGAUUA&UAAUCUGCAUCCUGAGGUCUA	2	0.0403142691393503
Qrob_T0769850.2:527	qrb-miR396	Qrob_T0769850.2	516	537	527	-36.60	-28.30	0.773224043715847	5	1-7,537-531;8-19,529-518	x-x,530-530[BULt];20-21,517-516[UP3]	..((((((((((((.(((((((&)))))))-))))))))))))..	GCGUUCAAGAAAGCUUGUGGAA&UUCCACG-GCUUUCUUGAACUG	0	0.00461513423906901

## Sheet: CT2_out
SiteID	Query	Transcript	TStart	TStop	TSlice	MFEperfect	MFEsite	MFEratio	AllenScore	Paired	Unpaired	Structure	Sequence	DegradomeCategory	DegradomePval
Qrob_T0004310.2:2404	qrb-miR319	Qrob_T0004310.2	2384	2413	2404	-41.60	-29.50	0.709134615384615	11	1-13,2413-2401;14-16,2390-2388;18-20,2386-2384	x-x,2400-2391[BULt];17-17,2387-2387[SIL]	(((.(((..........(((((((((((((&)))))))))))))----------))).)))	GGGCGCUGCAACGGGGACCCUUCAGUCCAA&UUGGACUGAAGGG----------AGCUCCC	1	0.0117662401361002
Qrob_T0010200.2:648	qrb-miR319	Qrob_T0010200.2	638	657	648	-41.60	-27.60	0.663461538461538	9	3-3,655-655;6-19,652-639	1-2,657-656[UP5];4-5,654-653[SIL];20-20,638-638[UP3]	.((((((((((((((..(..&..)..)))))))))))))).	UGGAGCUCUCUUCAGCACUG&UUGGACUGAAGGGAGCUCCC	0	0.0330366076644418
Qrob_T0026800.2:637	qrb-miR396	Qrob_T0026800.2	626	647	637	-36.60	-30.50	0.833333333333333	4	1-6,647-642;7-19,640-628	x-x,641-641[BULt];20-21,627-626[UP3]	..(((((((((((((.((((((&))))))-)))))))))))))..	CCGUUCAAGAAAGCCUGUGGAA&UUCCAC-GGCUUUCUUGAACUG	0	0.00173018403841296
Qrob_T0036220.2:1766	qrb-miR393	Qrob_T0036220.2	1754	1775	1766	-36.40	-33.50	0.92032967032967	4	1-18,1775-1758	19-22,1757-1754[UP3]	....((((((((((((((((((&))))))))))))))))))....	GAGGCAAUGCGAUCCCUUUGGA&UCCAAAGGGAUCGCAUUGAUUU	2	0.0143296312285749
Qrob_T0080450.2:697	qrb-miR171	Qrob_T0080450.2	685	707	697	-35.50	-26.10	0.735211267605634	6.5	1-3,707-705;4-13,703-694;15-22,692-685	x-x,704-704[BULt];14-14,693-693[SIL]	((((((((.((((((((((.(((&)))-)))))))))).))))))))	GAAGAGCCCGAUCAAUGUUGAUG&CGU-GAUAUUGAUUUGGCUCUUC	3	0.0463423536270605
Qrob_T0088850.2:1215	qrb-miR396	Qrob_T0088850.2	1204	1225	1215	-36.60	-30.70	0.83879781420765	4	1-6,1225-1220;7-19,1218-1206	x-x,1219-1219[BULt];20-21,1205-1204[UP3]	..(((((((((((((.((((((&))))))-)))))))))))))..	CCGUUCAAGAAAGCCUGUGGAA&UUCCAC-GGCUUUCUUGAACUG	2	0.0423758211148462
Qrob_T0095890.2:1334	qrb-miR535	Qrob_T0095890.2	1323	1342	1334	-38.00	-30.60	0.805263157894737	5	1-1,1342-1342;3-20,1341-1324	2-2,x-x[BULq];21-21,1323-1323[UP3]	.((((((((((((((((((-(&).)))))))))))))))))).	GAUGACGGCGAGAAUGAGC-C&GUGCUCGUUCUCGUUGUCAUG	4	0.0442272515844546
Qrob_T0162660.2:1923	qrb-miR172	Qrob_T0162660.2	1912	1932	1923	-34.30	-34.20	0.997084548104956	2	1-20,1932-1913	21-21,1912-1912[UP3]	.((((((((((((((((((((&)))))))))))))))))))).	CUGCAGCAUCAUCAGGAUUCU&AGAAUCUUGAUGAUGCUGCAU	2	0.0423758211148462
Qrob_T0190770.2:2552	qrb-miR167	Qrob_T0190770.2	2541	2561	2552	-38.90	-31.00	0.796915167095116	5	3-13,2559-2549;15-20,2547-2542	1-2,2561-2560[UP5];14-14,2548-2548[SIL];21-21,2541-2541[UP3]	.((((((.(((((((((((..&..))))))))))).)))))).	GAGAUCAGGCUGGCAGCUUGU&UGAAGCUGCCAGCAUGAUCUA	0	0.00138438687957265
Qrob_T0205770.2:926	novel_miRNA_UUAGUCCAAGACUCGGCCACA	Qrob_T0205770.2	915	935	926	-40.20	-38.60	0.960199004975124	6.5	2-21,934-915	1-1,935-935[UP5]	((((((((((((((((((((.&.))))))))))))))))))))	UGUGGCUGAGUCUUGGACUAG&UUAGUCCAAGACUCGGCCACA	0	0.00103846993781076
Qrob_T0222250.2:169	novel_miRNA_UAGGAAUUACAAAAAAGAGAG	Qrob_T0222250.2	158	178	169	-28.60	-26.20	0.916083916083916	2	1-7,178-172;9-21,170-158	8-8,171-171[SIL]	(((((((((((((.(((((((&))))))).)))))))))))))	CUCUCUUUUUUGUCAUUCCUA&UAGGAAUUACAAAAAAGAGAG	4	0.0223636931785187
Qrob_T0255290.2:164	novel_miRNA_UUUGGAAACGCACUUGAAUCG	Qrob_T0255290.2	153	173	164	-33.50	-33.00	0.985074626865672	1	1-20,173-154	21-21,153-153[UP3]	.((((((((((((((((((((&)))))))))))))))))))).	AGAUUCAAGUGCGUUUCCAAA&UUUGGAAACGCACUUGAAUCG	3	0.0463423536270605
Qrob_T0323550.2:1034	novel_miRNA_UUAGUCCAAGACUCGGCCACA	Qrob_T0323550.2	1023	1043	1034	-40.20	-38.80	0.965174129353234	0.5	1-21,1043-1023	NA	(((((((((((((((((((((&)))))))))))))))))))))	UGUGGUCGAGUCUUGGACUAA&UUAGUCCAAGACUCGGCCACA	4	0.0223636931785187
Qrob_T0323650.2:159	novel_miRNA_UUUGGAAACGCACUUGAAUCG	Qrob_T0323650.2	148	168	159	-33.50	-34.40	1	0.5	1-21,168-148	NA	(((((((((((((((((((((&)))))))))))))))))))))	CGAUUCAGGUGCGUUUCCAAA&UUUGGAAACGCACUUGAAUCG	1	0.000455127558281587
Qrob_T0323760.2:242	novel_miRNA_UUUGGAAACGCACUUGAAUCG	Qrob_T0323760.2	231	251	242	-33.50	-34.40	1	0.5	1-21,251-231	NA	(((((((((((((((((((((&)))))))))))))))))))))	CGAUUCAGGUGCGUUUCCAAA&UUUGGAAACGCACUUGAAUCG	0	0.00103846993781076
Qrob_T0327960.2:1388	qrb-miR160	Qrob_T0327960.2	1377	1397	1388	-45.20	-42.00	0.929203539823009	1	1-14,1397-1384;16-21,1382-1377	15-15,1383-1383[SIL]	((((((.((((((((((((((&)))))))))))))).))))))	UGGCAUGCAGGGAGCCAGGCA&UGCCUGGCUCCCUGAAUGCCA	0	0.000346276539538337
Qrob_T0332840.2:504	qrb-miR156	Qrob_T0332840.2	496	513	504	-32.90	-30.30	0.9209726443769	1	1-13,513-501;15-18,499-496	14-14,500-500[SIL]	((((.(((((((((((((&))))))))))))).))))	GCUCUCUCUCUUCUGUCA&UGACAGAAGAGAGUGAGC	0	0.00103846993781076
Qrob_T0332840.2:505	qrb-miR157	Qrob_T0332840.2	496	514	505	-32.00	-29.20	0.9125	2	1-11,514-504;13-19,502-496	12-12,503-503[SIL]	(((((((.(((((((((((&))))))))))).)))))))	GCUCUCUCUCUUCUGUCAA&UUGACAGAAGAUAGAGAGC	3	0.0134658089709092
Qrob_T0343720.2:1302	qrb-miR156	Qrob_T0343720.2	1294	1311	1302	-33.70	-29.40	0.87240356083086	2	2-13,1310-1299;15-18,1297-1294	1-1,1311-1311[UP5];14-14,1298-1298[SIL]	((((.((((((((((((.&.)))))))))))).))))	GCUCUCUCUCUUCUGUCA&CGACAGAAGAGAGUGAGC	0	0.00138438687957265
Qrob_T0357230.2:1695	qrb-miR166	Qrob_T0357230.2	1684	1704	1695	-44.10	-37.90	0.859410430839002	3	2-19,1703-1686	1-1,1704-1704[UP5];20-21,1685-1684[UP3]	..((((((((((((((((((.&.))))))))))))))))))..	CUGGAAUGAAGCCUGGUCCGG&UCGGACCAGGCUUCAUUCCCC	0	0.000346276539538337
Qrob_T0370790.2:1415	qrb-miR167	Qrob_T0370790.2	1404	1424	1415	-38.90	-31.90	0.820051413881748	4	3-13,1422-1412;15-21,1410-1404	1-2,1424-1423[UP5];14-14,1411-1411[SIL]	(((((((.(((((((((((..&..))))))))))).)))))))	UAGAUCAGGCUGGCAGCUUGU&UGAAGCUGCCAGCAUGAUCUA	2	0.0143296312285749
Qrob_T0402270.2:760	qrb-miR172	Qrob_T0402270.2	749	769	760	-34.30	-34.20	0.997084548104956	2	1-20,769-750	21-21,749-749[UP3]	.((((((((((((((((((((&)))))))))))))))))))).	CUGCAGCAUCAUCAGGAUUCU&AGAAUCUUGAUGAUGCUGCAU	4	0.0442272515844546
Qrob_T0415350.2:869	qrb-miR396	Qrob_T0415350.2	858	879	869	-36.60	-30.70	0.83879781420765	4	1-6,879-874;7-19,872-860	x-x,873-873[BULt];20-21,859-858[UP3]	..(((((((((((((.((((((&))))))-)))))))))))))..	GCGUUCAAGAAAGCCUGUGGAA&UUCCAC-GGCUUUCUUGAACUG	0	0.00138438687957265
Qrob_T0421940.2:1513	qrb-miR172	Qrob_T0421940.2	1500	1522	1513	-34.30	-23.60	0.688046647230321	6	1-10,1522-1513;12-16,1511-1507;17-21,1504-1500	11-11,1512-1512[SIL];x-x,1506-1505[BULt]	(((((..(((((.((((((((((&)))))))))).)))))--)))))	AUGCACCGCAUUUUCAAGGUUCU&AGAAUCUUGAUGAUGC--UGCAU	1	0.0256144152727699
Qrob_T0438850.2:2006	qrb-miR160	Qrob_T0438850.2	1995	2015	2006	-45.20	-41.20	0.911504424778761	2	1-14,2015-2002;16-20,2000-1996	15-15,2001-2001[SIL];21-21,1995-1995[UP3]	.(((((.((((((((((((((&)))))))))))))).))))).	AGGCAUACAGGGAGCCAGGCA&UGCCUGGCUCCCUGAAUGCCA	2	0.0284539241260029
Qrob_T0458490.2:894	novel_miRNA_UUUUAAGAACUCUAUAGGAUC	Qrob_T0458490.2	880	903	894	-29.60	-24.80	0.837837837837838	8.5	2-12,902-892;13-21,888-880	1-1,903-903[UP5];x-x,891-889[BULt]	(((((((((...(((((((((((.&.)))))))))))---)))))))))	GAUCCUGUAACUGAGUUCUUGAAU&UUUUAAGAACUC---UAUAGGAUC	4	0.0442272515844546
Qrob_T0485210.2:59	qrb-miR398	Qrob_T0485210.2	48	75	59	-43.80	-33.80	0.771689497716895	16	1-8,75-68;10-21,59-48	9-9,67-60[AILt]	((((((((((((........((((((((&))))))))-------.))))))))))))	CAGGGGCGACCUUACCUUUAAGAACACA&UGUGUUCU-------CAGGUCGCCCCUG	3	0.0267502899305775
Qrob_T0488670.2:368	qrb-miR162	Qrob_T0488670.2	353	377	368	-37.50	-29.20	0.778666666666667	6.5	1-2,377-376;4-13,374-365;14-21,360-353	3-3,375-375[SIL];x-x,364-361[BULt]	((((((((....((((((((((.((&)).))))))))))----))))))))	CUGGAUGCAACUGGAGGUUUAUGGA&UCGAUAAACCUCU----GCAUCCAG	3	0.0134658089709092
Qrob_T0519660.2:938	novel_miRNA_UUAGUCCAAGACUCGGCCACA	Qrob_T0519660.2	927	947	938	-40.20	-26.90	0.669154228855721	4	2-13,946-935;15-16,933-932;18-20,930-928	1-1,947-947[UP5];14-14,934-934[SIL];17-17,931-931[SIL];21-21,927-927[UP3]	.(((.((.((((((((((((.&.)))))))))))).)).))).	CGUGUCCAAGUCUUGGACUAG&UUAGUCCAAGACUCGGCCACA	0	0.0446871675900209
Qrob_T0535990.2:1337	qrb-miR160	Qrob_T0535990.2	1326	1346	1337	-45.40	-45.90	1	1	1-20,1346-1327	21-21,1326-1326[UP3]	.((((((((((((((((((((&)))))))))))))))))))).	AGGCAUACAGGGAGCCAGGCA&UGCCUGGCUCCCUGUAUGCCA	0	0.000692433171634921
Qrob_T0546290.2:679	novel_miRNA_AGUGGAAGGAUUGGAAAGACA	Qrob_T0546290.2	668	688	679	-36.10	-28.30	0.78393351800554	3	1-15,688-674;17-17,672-672;20-21,669-668	16-16,673-673[SIL];18-19,671-670[SIL]	((..(.(((((((((((((((&))))))))))))))).)..))	UGGAUGUCCAAUCCUUCCACU&AGUGGAAGGAUUGGAAAGACA	4	0.0442272515844546
Qrob_T0602040.2:1176	qrb-miR166	Qrob_T0602040.2	1165	1185	1176	-44.10	-37.40	0.848072562358277	3.5	2-19,1184-1167	1-1,1185-1185[UP5];20-21,1166-1165[UP3]	..((((((((((((((((((.&.))))))))))))))))))..	CUGGGAUGAAGCCUGGUCCGG&UCGGACCAGGCUUCAUUCCCC	0	0.00103846993781076
Qrob_T0626770.2:2180	qrb-miR393	Qrob_T0626770.2	2168	2189	2180	-36.40	-33.30	0.914835164835165	4	1-18,2189-2172	19-22,2171-2168[UP3]	....((((((((((((((((((&))))))))))))))))))....	GAGACAAUGCGAUCCCUUUGGA&UCCAAAGGGAUCGCAUUGAUUU	2	0.0284539241260029
Qrob_T0632290.2:1607	qrb-miR162	Qrob_T0632290.2	1596	1616	1607	-37.50	-28.30	0.754666666666667	4.5	1-10,1616-1607;11-16,1605-1600;18-21,1599-1596	x-x,1606-1606[BULt];17-17,x-x[BULq]	((((-((((((.((((((((((&))))))))))-)))))).))))	CUGG-UGCGGGUGGUUUAUCGA&UCGAUAAACC-UCUGCAUCCAG	3	0.0201305620682749
Qrob_T0633190.2:559	qrb-miR166	Qrob_T0633190.2	548	568	559	-44.10	-37.70	0.854875283446712	3.5	2-19,567-550	1-1,568-568[UP5];20-21,549-548[UP3]	..((((((((((((((((((.&.))))))))))))))))))..	CCGGGAUGAAGCCUGGUCCGG&UCGGACCAGGCUUCAUUCCCC	2	0.0284539241260029
Qrob_T0636470.2:1343	qrb-miR160	Qrob_T0636470.2	1332	1352	1343	-45.20	-37.60	0.831858407079646	3	1-14,1352-1339;16-19,1337-1334	15-15,1338-1338[SIL];20-21,1333-1332[UP3]	..((((.((((((((((((((&)))))))))))))).))))..	UAGCAUGCAGGGAGCCAGGCA&UGCCUGGCUCCCUGAAUGCCA	0	0.00138438687957265
Qrob_T0642710.2:967	qrb-miR159	Qrob_T0642710.2	956	976	967	-36.50	-32.80	0.898630136986301	3.5	2-6,975-971;8-21,969-956	1-1,976-976[UP5];7-7,970-970[SIL]	((((((((((((((.(((((.&.))))).))))))))))))))	UGGAGCUCCCUUCACUCCAAU&UUUGGAUUGAAGGGAGCUCUA	0	0.000346276539538337
Qrob_T0657660.2:1118	qrb-miR159	Qrob_T0657660.2	1107	1127	1118	-36.50	-28.00	0.767123287671233	3.5	1-5,1127-1123;7-14,1121-1114;16-21,1112-1107	6-6,1122-1122[SIL];15-15,1113-1113[SIL]	((((((.((((((((.(((((&))))).)))))))).))))))	UGGAGCCCCCUUCAAACCAAA&UUUGGAUUGAAGGGAGCUCUA	1	0.0072572367175292
Qrob_T0666260.2:996	novel_miRNA_UUAGUCCAAGACUCGGCCACA	Qrob_T0666260.2	985	1005	996	-40.20	-34.80	0.865671641791045	2	2-13,1004-993;15-21,991-985	1-1,1005-1005[UP5];14-14,992-992[SIL]	(((((((.((((((((((((.&.)))))))))))).)))))))	UGUGGCCAAGUCUUGGACUAG&UUAGUCCAAGACUCGGCCACA	0	0.00449225409830611
Qrob_T0666280.2:899	novel_miRNA_UUAGUCCAAGACUCGGCCACA	Qrob_T0666280.2	888	908	899	-40.20	-34.80	0.865671641791045	2	2-13,907-896;15-21,894-888	1-1,908-908[UP5];14-14,895-895[SIL]	(((((((.((((((((((((.&.)))))))))))).)))))))	UGUGGCCAAGUCUUGGACUAG&UUAGUCCAAGACUCGGCCACA	1	0.00544788010656716
Qrob_T0712850.2:216	qrb-miR535	Qrob_T0712850.2	205	225	216	-38.00	-29.40	0.773684210526316	8.5	1-7,225-219;10-18,216-208	8-9,218-217[SIL];19-21,207-205[UP3]	...(((((((((..(((((((&)))))))..)))))))))...	GGCGACGACGAGUUCGGGCAC&GUGCUCGUUCUCGUUGUCAUG	3	0.0267502899305775
Qrob_T0728010.2:905	novel_miRNA_UUAGUCCAAGACUCGGCCACA	Qrob_T0728010.2	894	914	905	-40.20	-33.20	0.825870646766169	3.5	1-11,914-904;13-21,902-894	12-12,903-903[SIL]	(((((((((.(((((((((((&))))))))))).)))))))))	UGUGGCUGAAUCUUGGACUGA&UUAGUCCAAGACUCGGCCACA	0	0.00759044908828388
Qrob_T0755640.2:161	qrb-miR530	Qrob_T0755640.2	149	169	161	-43.80	-29.70	0.678082191780822	5.5	1-5,169-165;7-14,164-157;16-21,154-149	6-6,x-x[BULq];15-15,156-155[AILt]	((((((..((((((((-(((((&))))).))))))))-.))))))	CCUGUGCGCUGUGCCU-CACCU&AGGUGCAGGUACAG-ACGCAGG	0	0.00655879025698347
Qrob_T0759270.2:242	qrb-miR2111	Qrob_T0759270.2	231	251	242	-37.10	-32.40	0.873315363881402	3	1-18,251-234	19-21,233-231[UP3]	...((((((((((((((((((&))))))))))))))))))...	UGUACCUCAGGAUGCAGAUUA&UAAUCUGCAUCCUGAGGUCUA	2	0.0423758211148462
Qrob_T0769850.2:527	qrb-miR396	Qrob_T0769850.2	516	537	527	-36.60	-28.30	0.773224043715847	5	1-7,537-531;8-19,529-518	x-x,530-530[BULt];20-21,517-516[UP3]	..((((((((((((.(((((((&)))))))-))))))))))))..	GCGUUCAAGAAAGCUUGUGGAA&UUCCACG-GCUUUCUUGAACUG	0	0.00587042196024523

## Sheet: CT3_out
SiteID	Query	Transcript	TStart	TStop	TSlice	MFEperfect	MFEsite	MFEratio	AllenScore	Paired	Unpaired	Structure	Sequence	DegradomeCategory	DegradomePval
Qrob_T0007340.2:491	qrb-miR166	Qrob_T0007340.2	476	500	491	-44.10	-28.80	0.653061224489796	10.5	2-8,499-493;10-16,491-485;17-21,480-476	1-1,500-500[UP5];9-9,492-492[SIL];x-x,484-481[BULt]	(((((....(((((((.(((((((.&.))))))).)))))))----)))))	GGGGAGGUUGUGAAGUGUGGUUUGG&UCGGACCAGGCUUCAU----UCCCC	0	0.0234715046688641
Qrob_T0007810.2:89	novel_miRNA_UUGCCGAAUCCGCCCAUUCCUA	Qrob_T0007810.2	77	98	89	-42.80	-33.40	0.780373831775701	6.5	1-7,98-92;9-20,90-79	8-8,91-91[SIL];21-22,78-77[UP3]	..((((((((((((.(((((((&))))))).))))))))))))..	GUGGGAUGGGUGGAAUUGGCAA&UUGCCGAAUCCGCCCAUUCCUA	0	0.00952090163231956
Qrob_T0023070.2:111	novel_miRNA_UUUGGAAACGCACUUGAAUCG	Qrob_T0023070.2	100	120	111	-33.50	-29.10	0.868656716417911	2.5	1-19,120-102	20-21,101-100[UP3]	..(((((((((((((((((((&)))))))))))))))))))..	CAAUUCAGGUGCGUUUCCAAA&UUUGGAAACGCACUUGAAUCG	0	0.0140847020997568
Qrob_T0026800.2:637	qrb-miR396	Qrob_T0026800.2	626	647	637	-36.60	-30.50	0.833333333333333	4	1-6,647-642;7-19,640-628	x-x,641-641[BULt];20-21,627-626[UP3]	..(((((((((((((.((((((&))))))-)))))))))))))..	CCGUUCAAGAAAGCCUGUGGAA&UUCCAC-GGCUUUCUUGAACUG	0	0.00164803965573412
Qrob_T0036220.2:1766	qrb-miR393	Qrob_T0036220.2	1754	1775	1766	-36.40	-33.50	0.92032967032967	4	1-18,1775-1758	19-22,1757-1754[UP3]	....((((((((((((((((((&))))))))))))))))))....	GAGGCAAUGCGAUCCCUUUGGA&UCCAAAGGGAUCGCAUUGAUUU	4	0.0228735883578733
Qrob_T0051100.2:704	novel_miRNA_UUGCCGAAUCCGCCCAUUCCUA	Qrob_T0051100.2	692	713	704	-42.80	-34.00	0.794392523364486	6	1-7,713-707;9-20,705-694	8-8,706-706[SIL];21-22,693-692[UP3]	..((((((((((((.(((((((&))))))).))))))))))))..	GUGGAAUGGGUGGAAUCGGUAA&UUGCCGAAUCCGCCCAUUCCUA	1	0.00832942504872669
Qrob_T0080520.2:649	qrb-miR156	Qrob_T0080520.2	641	658	649	-32.90	-30.30	0.9209726443769	1	1-13,658-646;15-18,644-641	14-14,645-645[SIL]	((((.(((((((((((((&))))))))))))).))))	GCUCUCUCUCUUCUGUCA&UGACAGAAGAGAGUGAGC	2	0.0398429573842209
Qrob_T0088850.2:1215	qrb-miR396	Qrob_T0088850.2	1204	1225	1215	-36.60	-30.70	0.83879781420765	4	1-6,1225-1220;7-19,1218-1206	x-x,1219-1219[BULt];20-21,1205-1204[UP3]	..(((((((((((((.((((((&))))))-)))))))))))))..	CCGUUCAAGAAAGCCUGUGGAA&UUCCAC-GGCUUUCUUGAACUG	2	0.0398429573842209
Qrob_T0133800.2:665	novel_miRNA_UUGCCGAAUCCGCCCAUUCCUA	Qrob_T0133800.2	653	674	665	-42.80	-32.90	0.768691588785047	7	1-7,674-668;9-21,666-654	8-8,667-667[SIL];22-22,653-653[UP3]	.(((((((((((((.(((((((&))))))).))))))))))))).	GGGGGAUGGGUGGAAUUGGUAA&UUGCCGAAUCCGCCCAUUCCUA	1	0.0218975078633825
Qrob_T0190770.2:2552	qrb-miR167	Qrob_T0190770.2	2541	2561	2552	-38.90	-31.00	0.796915167095116	5	3-13,2559-2549;15-20,2547-2542	1-2,2561-2560[UP5];14-14,2548-2548[SIL];21-21,2541-2541[UP3]	.((((((.(((((((((((..&..))))))))))).)))))).	GAGAUCAGGCUGGCAGCUUGU&UGAAGCUGCCAGCAUGAUCUA	0	0.00164803965573412
Qrob_T0283280.2:356	qrb-miR396	Qrob_T0283280.2	345	365	356	-40.10	-27.20	0.678304239401496	9	1-4,365-362;7-18,359-348	5-6,361-360[SIL];19-21,347-345[UP3]	...((((((((((((..((((&))))..))))))))))))...	GUGCCCACAGUUUUUGAGAGC&GCUCAAGAAAGCUGUGGGAGA	0	0.0134340203281377
Qrob_T0323550.2:1034	novel_miRNA_UUAGUCCAAGACUCGGCCACA	Qrob_T0323550.2	1023	1043	1034	-40.20	-38.80	0.965174129353234	0.5	1-21,1043-1023	NA	(((((((((((((((((((((&)))))))))))))))))))))	UGUGGUCGAGUCUUGGACUAA&UUAGUCCAAGACUCGGCCACA	0	0.000329825429025932
Qrob_T0323650.2:159	novel_miRNA_UUUGGAAACGCACUUGAAUCG	Qrob_T0323650.2	148	168	159	-33.50	-34.40	1	0.5	1-21,168-148	NA	(((((((((((((((((((((&)))))))))))))))))))))	CGAUUCAGGUGCGUUUCCAAA&UUUGGAAACGCACUUGAAUCG	4	0.0452239756713813
Qrob_T0323760.2:242	novel_miRNA_UUUGGAAACGCACUUGAAUCG	Qrob_T0323760.2	231	251	242	-33.50	-34.40	1	0.5	1-21,251-231	NA	(((((((((((((((((((((&)))))))))))))))))))))	CGAUUCAGGUGCGUUUCCAAA&UUUGGAAACGCACUUGAAUCG	0	0.00131864915072999
Qrob_T0327960.2:1388	qrb-miR160	Qrob_T0327960.2	1377	1397	1388	-45.20	-42.00	0.929203539823009	1	1-14,1397-1384;16-21,1382-1377	15-15,1383-1383[SIL]	((((((.((((((((((((((&)))))))))))))).))))))	UGGCAUGCAGGGAGCCAGGCA&UGCCUGGCUCCCUGAAUGCCA	0	0.000329825429025932
Qrob_T0332840.2:505	qrb-miR157	Qrob_T0332840.2	496	514	505	-32.00	-29.20	0.9125	2	1-11,514-504;13-19,502-496	12-12,503-503[SIL]	(((((((.(((((((((((&))))))))))).)))))))	GCUCUCUCUCUUCUGUCAA&UUGACAGAAGAUAGAGAGC	2	0.0267415541670303
Qrob_T0343720.2:1302	qrb-miR156	Qrob_T0343720.2	1294	1311	1302	-32.90	-30.10	0.914893617021277	1	1-13,1311-1299;15-18,1297-1294	14-14,1298-1298[SIL]	((((.(((((((((((((&))))))))))))).))))	GCUCUCUCUCUUCUGUCA&UGACAGAAGAGAGUGAGC	0	0.00230649477748102
Qrob_T0357230.2:1695	qrb-miR166	Qrob_T0357230.2	1684	1704	1695	-44.10	-37.90	0.859410430839002	3	2-19,1703-1686	1-1,1704-1704[UP5];20-21,1685-1684[UP3]	..((((((((((((((((((.&.))))))))))))))))))..	CUGGAAUGAAGCCUGGUCCGG&UCGGACCAGGCUUCAUUCCCC	0	0.000329825429025932
Qrob_T0357230.2:1697	qrb-miR166	Qrob_T0357230.2	1686	1705	1697	-42.00	-38.40	0.914285714285714	2	1-2,1705-1704;4-21,1703-1686	3-3,x-x[BULq]	((((((((((((((((((-((&)).))))))))))))))))))	GGAAUGAAGCCUGGUCCG-GA&UCUCGGACCAGGCUUCAUUCC	4	0.0228735883578733
Qrob_T0370790.2:1415	qrb-miR167	Qrob_T0370790.2	1403	1424	1415	-42.10	-32.90	0.781472684085511	4.5	3-13,1422-1412;15-22,1410-1403	1-2,1424-1423[UP5];14-14,1411-1411[SIL]	((((((((.(((((((((((..&..))))))))))).))))))))	UUAGAUCAGGCUGGCAGCUUGU&UGAAGCUGCCAGCAUGAUCUGA	4	0.0228735883578733
Qrob_T0402270.2:760	qrb-miR172	Qrob_T0402270.2	749	769	760	-34.30	-34.20	0.997084548104956	2	1-20,769-750	21-21,749-749[UP3]	.((((((((((((((((((((&)))))))))))))))))))).	CUGCAGCAUCAUCAGGAUUCU&AGAAUCUUGAUGAUGCUGCAU	1	0.000491897128974794
Qrob_T0415350.2:869	qrb-miR396	Qrob_T0415350.2	858	879	869	-36.60	-30.70	0.83879781420765	4	1-6,879-874;7-19,872-860	x-x,873-873[BULt];20-21,859-858[UP3]	..(((((((((((((.((((((&))))))-)))))))))))))..	GCGUUCAAGAAAGCCUGUGGAA&UUCCAC-GGCUUUCUUGAACUG	0	0.00131864915072999
Qrob_T0438850.2:2006	qrb-miR160	Qrob_T0438850.2	1995	2015	2006	-45.20	-41.20	0.911504424778761	2	1-14,2015-2002;16-20,2000-1996	15-15,2001-2001[SIL];21-21,1995-1995[UP3]	.(((((.((((((((((((((&)))))))))))))).))))).	AGGCAUACAGGGAGCCAGGCA&UGCCUGGCUCCCUGAAUGCCA	2	0.0267415541670303
Qrob_T0458490.2:894	novel_miRNA_UUUUAAGAACUCUAUAGGAUC	Qrob_T0458490.2	880	903	894	-29.60	-24.80	0.837837837837838	8.5	2-12,902-892;13-21,888-880	1-1,903-903[UP5];x-x,891-889[BULt]	(((((((((...(((((((((((.&.)))))))))))---)))))))))	GAUCCUGUAACUGAGUUCUUGAAU&UUUUAAGAACUC---UAUAGGAUC	4	0.0452239756713813
Qrob_T0477920.2:938	novel_miRNA_UUAGUCCAAGACUCGGCCACA	Qrob_T0477920.2	927	947	938	-40.20	-30.60	0.761194029850746	3	1-3,947-945;5-21,943-927	4-4,944-944[SIL]	(((((((((((((((((.(((&))).)))))))))))))))))	UGUGGUUGAGUCUUGGAAUAA&UUAGUCCAAGACUCGGCCACA	0	0.0134340203281377
Qrob_T0488670.2:368	qrb-miR162	Qrob_T0488670.2	353	377	368	-37.50	-29.20	0.778666666666667	6.5	1-2,377-376;4-13,374-365;14-21,360-353	3-3,375-375[SIL];x-x,364-361[BULt]	((((((((....((((((((((.((&)).))))))))))----))))))))	CUGGAUGCAACUGGAGGUUUAUGGA&UCGAUAAACCUCU----GCAUCCAG	3	0.0113273949846164
Qrob_T0516490.2:696	novel_miRNA_AGUGGAAGGAUUGGAAAGACA	Qrob_T0516490.2	685	705	696	-36.10	-28.00	0.775623268698061	5	1-2,705-704;4-18,702-688	3-3,703-703[SIL];19-21,687-685[UP3]	...(((((((((((((((.((&)).)))))))))))))))...	AGCCUUUCCAAUCCUUCCUCU&AGUGGAAGGAUUGGAAAGACA	3	0.0169428850463955
Qrob_T0535990.2:1337	qrb-miR160	Qrob_T0535990.2	1326	1346	1337	-45.40	-45.90	1	1	1-20,1346-1327	21-21,1326-1326[UP3]	.((((((((((((((((((((&)))))))))))))))))))).	AGGCAUACAGGGAGCCAGGCA&UGCCUGGCUCCCUGUAUGCCA	0	0.000329825429025932
Qrob_T0602040.2:1176	qrb-miR166	Qrob_T0602040.2	1165	1185	1176	-44.10	-37.40	0.848072562358277	3.5	2-19,1184-1167	1-1,1185-1185[UP5];20-21,1166-1165[UP3]	..((((((((((((((((((.&.))))))))))))))))))..	CUGGGAUGAAGCCUGGUCCGG&UCGGACCAGGCUUCAUUCCCC	0	0.000989149968516845
Qrob_T0619560.2:2983	qrb-miR166	Qrob_T0619560.2	2971	2991	2983	-42.00	-30.10	0.716666666666667	5.5	1-6,2991-2986;8-13,2985-2980;14-21,2978-2971	7-7,x-x[BULq];x-x,2979-2979[BULt]	((((((((.((((((-((((((&)))))).))))))-))))))))	GGAGUGAAGGUCUGG-CUGAGA&UCUCGGACCAGGC-UUCAUUCC	1	0.00881722495743409
Qrob_T0626770.2:2180	qrb-miR393	Qrob_T0626770.2	2168	2189	2180	-36.40	-33.30	0.914835164835165	4	1-18,2189-2172	19-22,2171-2168[UP3]	....((((((((((((((((((&))))))))))))))))))....	GAGACAAUGCGAUCCCUUUGGA&UCCAAAGGGAUCGCAUUGAUUU	2	0.0267415541670303
Qrob_T0633190.2:559	qrb-miR166	Qrob_T0633190.2	548	568	559	-44.10	-37.70	0.854875283446712	3.5	2-19,567-550	1-1,568-568[UP5];20-21,549-548[UP3]	..((((((((((((((((((.&.))))))))))))))))))..	CCGGGAUGAAGCCUGGUCCGG&UCGGACCAGGCUUCAUUCCCC	0	0.000659542073238262
Qrob_T0636470.2:1343	qrb-miR160	Qrob_T0636470.2	1332	1352	1343	-45.20	-37.60	0.831858407079646	3	1-14,1352-1339;16-19,1337-1334	15-15,1338-1338[SIL];20-21,1333-1332[UP3]	..((((.((((((((((((((&)))))))))))))).))))..	UAGCAUGCAGGGAGCCAGGCA&UGCCUGGCUCCCUGAAUGCCA	0	0.00131864915072999
Qrob_T0642710.2:967	qrb-miR159	Qrob_T0642710.2	956	976	967	-36.50	-32.80	0.898630136986301	3.5	2-6,975-971;8-21,969-956	1-1,976-976[UP5];7-7,970-970[SIL]	((((((((((((((.(((((.&.))))).))))))))))))))	UGGAGCUCCCUUCACUCCAAU&UUUGGAUUGAAGGGAGCUCUA	0	0.000329825429025932
Qrob_T0749650.2:1321	qrb-miR172	Qrob_T0749650.2	1310	1330	1321	-34.30	-34.20	0.997084548104956	2	1-20,1330-1311	21-21,1310-1310[UP3]	.((((((((((((((((((((&)))))))))))))))))))).	UUGCAGCAUCAUCAGGAUUCU&AGAAUCUUGAUGAUGCUGCAU	2	0.0267415541670303
Qrob_T0759270.2:242	qrb-miR2111	Qrob_T0759270.2	231	251	242	-37.10	-32.40	0.873315363881402	3	1-18,251-234	19-21,233-231[UP3]	...((((((((((((((((((&))))))))))))))))))...	UGUACCUCAGGAUGCAGAUUA&UAAUCUGCAUCCUGAGGUCUA	2	0.0398429573842209
Qrob_T0769850.2:527	qrb-miR396	Qrob_T0769850.2	516	537	527	-36.60	-28.30	0.773224043715847	5	1-7,537-531;8-19,529-518	x-x,530-530[BULt];20-21,517-516[UP3]	..((((((((((((.(((((((&)))))))-))))))))))))..	GCGUUCAAGAAAGCUUGUGGAA&UUCCACG-GCUUUCUUGAACUG	0	0.00460766963680337

## Sheet: DS1_out
SiteID	Query	Transcript	TStart	TStop	TSlice	MFEperfect	MFEsite	MFEratio	AllenScore	Paired	Unpaired	Structure	Sequence	DegradomeCategory	DegradomePval
Qrob_T0004940.2:747	qrb-miR530	Qrob_T0004940.2	735	756	747	-43.80	-31.30	0.714611872146119	6	1-13,756-744;14-14,742-742;17-21,739-735	x-x,743-743[BULt];15-16,741-740[SIL]	(((((..(.(((((((((((((&)))))))))))))-)..)))))	CCUGCAACUUGUGCCUGUGCCU&AGGUGCAGGUACA-GACGCAGG	2	0.0374522406848881
Qrob_T0026800.2:637	qrb-miR396	Qrob_T0026800.2	626	647	637	-36.60	-30.50	0.833333333333333	4	1-6,647-642;7-19,640-628	x-x,641-641[BULt];20-21,627-626[UP3]	..(((((((((((((.((((((&))))))-)))))))))))))..	CCGUUCAAGAAAGCCUGUGGAA&UUCCAC-GGCUUUCUUGAACUG	0	0.00152592716279498
Qrob_T0064440.2:252	qrb-miR171	Qrob_T0064440.2	241	261	252	-36.50	-28.20	0.772602739726027	6	1-3,261-259;5-17,257-245	4-4,258-258[SIL];18-21,244-241[UP3]	....(((((((((((((.(((&))).)))))))))))))....	UCGAGAACCUCACCAACCUCG&CGAUGUUGGUGAGGUUCAAUC	0	0.00396256891785285
Qrob_T0080450.2:697	qrb-miR171	Qrob_T0080450.2	685	707	697	-35.50	-26.10	0.735211267605634	6.5	1-3,707-705;4-13,703-694;15-22,692-685	x-x,704-704[BULt];14-14,693-693[SIL]	((((((((.((((((((((.(((&)))-)))))))))).))))))))	GAAGAGCCCGAUCAAUGUUGAUG&CGU-GAUAUUGAUUUGGCUCUUC	3	0.0338908136916388
Qrob_T0088850.2:1215	qrb-miR396	Qrob_T0088850.2	1204	1225	1215	-36.60	-30.70	0.83879781420765	4	1-6,1225-1220;7-19,1218-1206	x-x,1219-1219[BULt];20-21,1205-1204[UP3]	..(((((((((((((.((((((&))))))-)))))))))))))..	CCGUUCAAGAAAGCCUGUGGAA&UUCCAC-GGCUUUCUUGAACUG	1	0.00204716989262488
Qrob_T0088850.2:964	qrb-miR390	Qrob_T0088850.2	950	973	964	-44.30	-35.90	0.81038374717833	4.5	1-18,973-956;19-21,952-950	x-x,955-953[BULt]	(((...((((((((((((((((((&))))))))))))))))))---)))	GGUACUGCUGUUCCUCCUGAGCUU&AAGCUCAGGAGGGAUAGC---GCC	1	0.00153577065229493
Qrob_T0128920.2:1152	qrb-miR156	Qrob_T0128920.2	1144	1161	1152	-32.90	-30.30	0.9209726443769	1	1-13,1161-1149;15-18,1147-1144	14-14,1148-1148[SIL]	((((.(((((((((((((&))))))))))))).))))	GCUCUCUCUCUUCUGUCA&UGACAGAAGAGAGUGAGC	2	0.0496219808545887
Qrob_T0146430.2:662	novel_miRNA_UUGCCGAAUCCGCCCAUUCCUA	Qrob_T0146430.2	650	671	662	-42.80	-35.50	0.829439252336449	5.5	1-7,671-665;9-21,663-651	8-8,664-664[SIL];22-22,650-650[UP3]	.(((((((((((((.(((((((&))))))).))))))))))))).	GGGGAAUGGGUGGAAUCGGUAA&UUGCCGAAUCCGCCCAUUCCUA	1	0.00357979656147844
Qrob_T0156190.2:1730	qrb-miR167	Qrob_T0156190.2	1719	1739	1730	-38.90	-31.00	0.796915167095116	5	3-13,1737-1727;15-20,1725-1720	1-2,1739-1738[UP5];14-14,1726-1726[SIL];21-21,1719-1719[UP3]	.((((((.(((((((((((..&..))))))))))).)))))).	GAGAUCAGGCUGGCAGCUUGU&UGAAGCUGCCAGCAUGAUCUA	2	0.0496219808545887
Qrob_T0190770.2:2552	qrb-miR167	Qrob_T0190770.2	2541	2561	2552	-38.90	-31.00	0.796915167095116	5	3-13,2559-2549;15-20,2547-2542	1-2,2561-2560[UP5];14-14,2548-2548[SIL];21-21,2541-2541[UP3]	.((((((.(((((((((((..&..))))))))))).)))))).	GAGAUCAGGCUGGCAGCUUGU&UGAAGCUGCCAGCAUGAUCUA	0	0.00152592716279498
Qrob_T0323550.2:1034	novel_miRNA_UUAGUCCAAGACUCGGCCACA	Qrob_T0323550.2	1023	1043	1034	-40.20	-38.80	0.965174129353234	0.5	1-21,1043-1023	NA	(((((((((((((((((((((&)))))))))))))))))))))	UGUGGUCGAGUCUUGGACUAA&UUAGUCCAAGACUCGGCCACA	0	0.000305371879584238
Qrob_T0323760.2:242	novel_miRNA_UUUGGAAACGCACUUGAAUCG	Qrob_T0323760.2	231	251	242	-33.50	-34.40	1	0.5	1-21,251-231	NA	(((((((((((((((((((((&)))))))))))))))))))))	CGAUUCAGGUGCGUUUCCAAA&UUUGGAAACGCACUUGAAUCG	0	0.000610650507183674
Qrob_T0327960.2:1388	qrb-miR160	Qrob_T0327960.2	1377	1397	1388	-45.20	-42.00	0.929203539823009	1	1-14,1397-1384;16-21,1382-1377	15-15,1383-1383[SIL]	((((((.((((((((((((((&)))))))))))))).))))))	UGGCAUGCAGGGAGCCAGGCA&UGCCUGGCUCCCUGAAUGCCA	2	0.0126432585312544
Qrob_T0332840.2:505	qrb-miR157	Qrob_T0332840.2	496	514	505	-32.00	-29.20	0.9125	2	1-11,514-504;13-19,502-496	12-12,503-503[SIL]	(((((((.(((((((((((&))))))))))).)))))))	GCUCUCUCUCUUCUGUCAA&UUGACAGAAGAUAGAGAGC	2	0.0251266650762206
Qrob_T0343720.2:1302	qrb-miR156	Qrob_T0343720.2	1294	1311	1302	-33.70	-29.40	0.87240356083086	2	2-13,1310-1299;15-18,1297-1294	1-1,1311-1311[UP5];14-14,1298-1298[SIL]	((((.((((((((((((.&.)))))))))))).))))	GCUCUCUCUCUUCUGUCA&CGACAGAAGAGAGUGAGC	0	0.0018308330671335
Qrob_T0357230.2:1695	qrb-miR166	Qrob_T0357230.2	1684	1704	1695	-44.10	-37.90	0.859410430839002	3	2-19,1703-1686	1-1,1704-1704[UP5];20-21,1685-1684[UP3]	..((((((((((((((((((.&.))))))))))))))))))..	CUGGAAUGAAGCCUGGUCCGG&UCGGACCAGGCUUCAUUCCCC	0	0.000305371879584238
Qrob_T0370790.2:1415	qrb-miR167	Qrob_T0370790.2	1404	1424	1415	-38.90	-31.90	0.820051413881748	4	3-13,1422-1412;15-21,1410-1404	1-2,1424-1423[UP5];14-14,1411-1411[SIL]	(((((((.(((((((((((..&..))))))))))).)))))))	UAGAUCAGGCUGGCAGCUUGU&UGAAGCUGCCAGCAUGAUCUA	2	0.0126432585312544
Qrob_T0415350.2:869	qrb-miR396	Qrob_T0415350.2	858	879	869	-36.60	-30.70	0.83879781420765	4	1-6,879-874;7-19,872-860	x-x,873-873[BULt];20-21,859-858[UP3]	..(((((((((((((.((((((&))))))-)))))))))))))..	GCGUUCAAGAAAGCCUGUGGAA&UUCCAC-GGCUUUCUUGAACUG	0	0.000915835911274865
Qrob_T0438850.2:2006	qrb-miR160	Qrob_T0438850.2	1995	2015	2006	-45.40	-45.90	1	1	1-20,2015-1996	21-21,1995-1995[UP3]	.((((((((((((((((((((&)))))))))))))))))))).	AGGCAUACAGGGAGCCAGGCA&UGCCUGGCUCCCUGUAUGCCA	2	0.0126432585312544
Qrob_T0474800.2:97	novel_miRNA_AAAUGGGUGCGUUGGCAAGAAG	Qrob_T0474800.2	85	108	97	-39.50	-26.68	0.675443037974684	12	1-8,108-101;11-20,96-87	9-10,100-97[AILt];21-22,86-85[UP3]	..((((((((((....((((((((&))))))))--..))))))))))..	ACUCUUGCCAGCCAAAGCCCAUUU&AAAUGGGU--GCGUUGGCAAGAAG	1	0.0297744474224578
Qrob_T0485420.2:128	novel_miRNA_UUUGGAAACGCACUUGAAUCG	Qrob_T0485420.2	117	137	128	-33.50	-30.50	0.91044776119403	2.5	1-6,137-132;8-21,130-117	7-7,131-131[SIL]	((((((((((((((.((((((&)))))).))))))))))))))	CGAUUCAAGUGCGUCUCCAAG&UUUGGAAACGCACUUGAAUCG	1	0.0132319215089207
Qrob_T0485430.2:107	novel_miRNA_UUUGGAAACGCACUUGAAUCG	Qrob_T0485430.2	96	116	107	-33.50	-30.70	0.916417910447761	2.5	1-6,116-111;8-21,109-96	7-7,110-110[SIL]	((((((((((((((.((((((&)))))).))))))))))))))	CGAUUCAAGUGCGUCUCCAAG&UUUGGAAACGCACUUGAAUCG	0	0.00730324510642144
Qrob_T0501280.2:1194	qrb-miR390	Qrob_T0501280.2	1183	1202	1194	-44.30	-29.20	0.659142212189616	9	4-6,1199-1197;8-21,1196-1183	1-3,1202-1200[UP5];7-7,x-x[BULq]	((((((((((((((-(((...&...))).))))))))))))))	GGCGCUAUCUCUUC-GAGAAC&AAGCUCAGGAGGGAUAGCGCC	0	0.0274104105175622
Qrob_T0535990.2:1337	qrb-miR160	Qrob_T0535990.2	1326	1346	1337	-45.20	-41.20	0.911504424778761	2	1-14,1346-1333;16-20,1331-1327	15-15,1332-1332[SIL];21-21,1326-1326[UP3]	.(((((.((((((((((((((&)))))))))))))).))))).	AGGCAUACAGGGAGCCAGGCA&UGCCUGGCUCCCUGAAUGCCA	0	0.000610650507183674
Qrob_T0602040.2:1176	qrb-miR166	Qrob_T0602040.2	1165	1185	1176	-44.10	-37.40	0.848072562358277	3.5	2-19,1184-1167	1-1,1185-1185[UP5];20-21,1166-1165[UP3]	..((((((((((((((((((.&.))))))))))))))))))..	CUGGGAUGAAGCCUGGUCCGG&UCGGACCAGGCUUCAUUCCCC	0	0.000915835911274865
Qrob_T0626770.2:2180	qrb-miR393	Qrob_T0626770.2	2168	2189	2180	-36.40	-33.30	0.914835164835165	4	1-18,2189-2172	19-22,2171-2168[UP3]	....((((((((((((((((((&))))))))))))))))))....	GAGACAAUGCGAUCCCUUUGGA&UCCAAAGGGAUCGCAUUGAUUU	2	0.0251266650762206
Qrob_T0632290.2:1607	qrb-miR162	Qrob_T0632290.2	1596	1616	1607	-37.50	-28.30	0.754666666666667	4.5	1-10,1616-1607;11-16,1605-1600;18-21,1599-1596	x-x,1606-1606[BULt];17-17,x-x[BULq]	((((-((((((.((((((((((&))))))))))-)))))).))))	CUGG-UGCGGGUGGUUUAUCGA&UCGAUAAACC-UCUGCAUCCAG	2	0.0496219808545887
Qrob_T0633190.2:559	qrb-miR166	Qrob_T0633190.2	548	568	559	-44.10	-37.70	0.854875283446712	3.5	2-19,567-550	1-1,568-568[UP5];20-21,549-548[UP3]	..((((((((((((((((((.&.))))))))))))))))))..	CCGGGAUGAAGCCUGGUCCGG&UCGGACCAGGCUUCAUUCCCC	0	0.000610650507183674
Qrob_T0636470.2:1343	qrb-miR160	Qrob_T0636470.2	1332	1352	1343	-45.20	-37.60	0.831858407079646	3	1-14,1352-1339;16-19,1337-1334	15-15,1338-1338[SIL];20-21,1333-1332[UP3]	..((((.((((((((((((((&)))))))))))))).))))..	UAGCAUGCAGGGAGCCAGGCA&UGCCUGGCUCCCUGAAUGCCA	0	0.00122092812032559
Qrob_T0642710.2:967	qrb-miR159	Qrob_T0642710.2	956	976	967	-36.50	-32.80	0.898630136986301	3.5	2-6,975-971;8-21,969-956	1-1,976-976[UP5];7-7,970-970[SIL]	((((((((((((((.(((((.&.))))).))))))))))))))	UGGAGCUCCCUUCACUCCAAU&UUUGGAUUGAAGGGAGCUCUA	2	0.0251266650762206
Qrob_T0749650.2:1321	qrb-miR172	Qrob_T0749650.2	1310	1330	1321	-34.30	-34.20	0.997084548104956	2	1-20,1330-1311	21-21,1310-1310[UP3]	.((((((((((((((((((((&)))))))))))))))))))).	UUGCAGCAUCAUCAGGAUUCU&AGAAUCUUGAUGAUGCUGCAU	2	0.0251266650762206
Qrob_T0759270.2:242	qrb-miR2111	Qrob_T0759270.2	231	251	242	-37.10	-32.40	0.873315363881402	3	1-18,251-234	19-21,233-231[UP3]	...((((((((((((((((((&))))))))))))))))))...	UGUACCUCAGGAUGCAGAUUA&UAAUCUGCAUCCUGAGGUCUA	2	0.0374522406848881
Qrob_T0769850.2:527	qrb-miR396	Qrob_T0769850.2	516	537	527	-36.60	-28.30	0.773224043715847	5	1-7,537-531;8-19,529-518	x-x,530-530[BULt];20-21,517-516[UP3]	..((((((((((((.(((((((&)))))))-))))))))))))..	GCGUUCAAGAAAGCUUGUGGAA&UUCCACG-GCUUUCUUGAACUG	0	0.00487477576621176

## Sheet: DS2_out
SiteID	Query	Transcript	TStart	TStop	TSlice	MFEperfect	MFEsite	MFEratio	AllenScore	Paired	Unpaired	Structure	Sequence	DegradomeCategory	DegradomePval
Qrob_T0026800.2:637	qrb-miR396	Qrob_T0026800.2	626	647	637	-36.60	-30.50	0.833333333333333	4	1-6,647-642;7-19,640-628	x-x,641-641[BULt];20-21,627-626[UP3]	..(((((((((((((.((((((&))))))-)))))))))))))..	CCGUUCAAGAAAGCCUGUGGAA&UUCCAC-GGCUUUCUUGAACUG	0	0.00166913330433527
Qrob_T0036220.2:1766	qrb-miR393	Qrob_T0036220.2	1754	1775	1766	-36.40	-33.50	0.92032967032967	4	1-18,1775-1758	19-22,1757-1754[UP3]	....((((((((((((((((((&))))))))))))))))))....	GAGGCAAUGCGAUCCCUUUGGA&UCCAAAGGGAUCGCAUUGAUUU	4	0.0287255726295408
Qrob_T0080520.2:649	qrb-miR156	Qrob_T0080520.2	641	658	649	-32.90	-30.30	0.9209726443769	1	1-13,658-646;15-18,644-641	14-14,645-645[SIL]	((((.(((((((((((((&))))))))))))).))))	GCUCUCUCUCUUCUGUCA&UGACAGAAGAGAGUGAGC	2	0.0460149813921585
Qrob_T0088850.2:1215	qrb-miR396	Qrob_T0088850.2	1204	1225	1215	-36.60	-30.70	0.83879781420765	4	1-6,1225-1220;7-19,1218-1206	x-x,1219-1219[BULt];20-21,1205-1204[UP3]	..(((((((((((((.((((((&))))))-)))))))))))))..	CCGUUCAAGAAAGCCUGUGGAA&UUCCAC-GGCUUUCUUGAACUG	1	0.000956791326743867
Qrob_T0122500.2:970	qrb-miR159	Qrob_T0122500.2	959	979	970	-36.50	-32.80	0.898630136986301	3.5	2-6,978-974;8-21,972-959	1-1,979-979[UP5];7-7,973-973[SIL]	((((((((((((((.(((((.&.))))).))))))))))))))	UGGAGCUCCCUUCACUCCAAU&UUUGGAUUGAAGGGAGCUCUA	0	0.000667987940389692
Qrob_T0125800.2:691	qrb-miR167	Qrob_T0125800.2	679	699	691	-42.10	-32.30	0.767220902612826	4.5	1-7,699-693;9-21,692-680	8-8,x-x[BULq];22-22,679-679[UP3]	.(((((((((((((-(((((((&))))))).))))))))))))).	GCGGAUCAUGCUGG-AGUUUCA&UGAAGCUGCCAGCAUGAUCUGA	3	0.0139830652353202
Qrob_T0128920.2:1152	qrb-miR156	Qrob_T0128920.2	1144	1161	1152	-33.70	-29.40	0.87240356083086	2	2-13,1160-1149;15-18,1147-1144	1-1,1161-1161[UP5];14-14,1148-1148[SIL]	((((.((((((((((((.&.)))))))))))).))))	GCUCUCUCUCUUCUGUCA&CGACAGAAGAGAGUGAGC	2	0.0460149813921585
Qrob_T0146430.2:662	novel_miRNA_UUGCCGAAUCCGCCCAUUCCUA	Qrob_T0146430.2	650	671	662	-42.80	-35.50	0.829439252336449	5.5	1-7,671-665;9-21,663-651	8-8,664-664[SIL];22-22,650-650[UP3]	.(((((((((((((.(((((((&))))))).))))))))))))).	GGGGAAUGGGUGGAAUCGGUAA&UUGCCGAAUCCGCCCAUUCCUA	1	0.0033447664672055
Qrob_T0156190.2:1730	qrb-miR167	Qrob_T0156190.2	1719	1739	1730	-38.90	-31.00	0.796915167095116	5	3-13,1737-1727;15-20,1725-1720	1-2,1739-1738[UP5];14-14,1726-1726[SIL];21-21,1719-1719[UP3]	.((((((.(((((((((((..&..))))))))))).)))))).	GAGAUCAGGCUGGCAGCUUGU&UGAAGCUGCCAGCAUGAUCUA	0	0.00166913330433527
Qrob_T0162660.2:1923	qrb-miR172	Qrob_T0162660.2	1912	1932	1923	-34.30	-34.20	0.997084548104956	2	1-20,1932-1913	21-21,1912-1912[UP3]	.((((((((((((((((((((&)))))))))))))))))))).	CUGCAGCAUCAUCAGGAUUCU&AGAAUCUUGAUGAUGCUGCAU	0	0.000334049764817546
Qrob_T0190770.2:2552	qrb-miR167	Qrob_T0190770.2	2541	2561	2552	-38.90	-31.00	0.796915167095116	5	3-13,2559-2549;15-20,2547-2542	1-2,2561-2560[UP5];14-14,2548-2548[SIL];21-21,2541-2541[UP3]	.((((((.(((((((((((..&..))))))))))).)))))).	GAGAUCAGGCUGGCAGCUUGU&UGAAGCUGCCAGCAUGAUCUA	0	0.00133552967289097
Qrob_T0191090.2:122	qrb-miR156	Qrob_T0191090.2	114	131	122	-33.70	-30.10	0.893175074183976	2	2-17,130-115	1-1,131-131[UP5];18-18,114-114[UP3]	.((((((((((((((((.&.)))))))))))))))).	CCUCACUCUCUUCUGUCA&CGACAGAAGAGAGUGAGC	2	0.0155797966321454
Qrob_T0205770.2:926	novel_miRNA_UUAGUCCAAGACUCGGCCACA	Qrob_T0205770.2	915	935	926	-40.20	-38.60	0.960199004975124	1.5	2-21,934-915	1-1,935-935[UP5]	((((((((((((((((((((.&.))))))))))))))))))))	UGUGGCUGAGUCUUGGACUAG&UUAGUCCAAGACUCGGCCACA	1	0.00143484364173674
Qrob_T0233240.2:3026	qrb-miR390	Qrob_T0233240.2	3015	3035	3026	-44.30	-37.10	0.837471783295711	3.5	1-9,3035-3027;11-21,3025-3015	10-10,3026-3026[SIL]	(((((((((((.(((((((((&))))))))).)))))))))))	GGUGCUAUCCCAUCUGAGCUU&AAGCUCAGGAGGGAUAGCGCC	4	0.0287255726295408
Qrob_T0323760.2:242	novel_miRNA_UUUGGAAACGCACUUGAAUCG	Qrob_T0323760.2	231	251	242	-33.50	-34.40	1	0.5	1-21,251-231	NA	(((((((((((((((((((((&)))))))))))))))))))))	CGAUUCAGGUGCGUUUCCAAA&UUUGGAAACGCACUUGAAUCG	0	0.000334049764817546
Qrob_T0323810.2:115	novel_miRNA_UUUGGAAACGCACUUGAAUCG	Qrob_T0323810.2	104	124	115	-33.50	-34.40	1	0.5	1-21,124-104	NA	(((((((((((((((((((((&)))))))))))))))))))))	CGAUUCAGGUGCGUUUCCAAA&UUUGGAAACGCACUUGAAUCG	0	0.00133552967289097
Qrob_T0327960.2:1388	qrb-miR160	Qrob_T0327960.2	1377	1397	1388	-45.20	-42.00	0.929203539823009	1	1-14,1397-1384;16-21,1382-1377	15-15,1383-1383[SIL]	((((((.((((((((((((((&)))))))))))))).))))))	UGGCAUGCAGGGAGCCAGGCA&UGCCUGGCUCCCUGAAUGCCA	0	0.000334049764817546
Qrob_T0332840.2:505	qrb-miR157	Qrob_T0332840.2	496	514	505	-32.00	-29.20	0.9125	2	1-11,514-504;13-19,502-496	12-12,503-503[SIL]	(((((((.(((((((((((&))))))))))).)))))))	GCUCUCUCUCUUCUGUCAA&UUGACAGAAGAUAGAGAGC	2	0.0309168632011916
Qrob_T0343720.2:1302	qrb-miR156	Qrob_T0343720.2	1294	1311	1302	-33.70	-29.40	0.87240356083086	2	2-13,1310-1299;15-18,1297-1294	1-1,1311-1311[UP5];14-14,1298-1298[SIL]	((((.((((((((((((.&.)))))))))))).))))	GCUCUCUCUCUUCUGUCA&CGACAGAAGAGAGUGAGC	0	0.00200262549556507
Qrob_T0349780.2:476	qrb-miR408	Qrob_T0349780.2	465	485	476	-45.30	-34.50	0.76158940397351	6	3-21,483-465	1-2,485-484[UP5]	(((((((((((((((((((..&..)))))))))))))))))))	CCGUGUUCUGCCUGUUCUUAU&CGGGGAACAGGCAGAGCAUGG	2	0.0155797966321454
Qrob_T0357230.2:1695	qrb-miR166	Qrob_T0357230.2	1684	1704	1695	-44.10	-37.90	0.859410430839002	3	2-19,1703-1686	1-1,1704-1704[UP5];20-21,1685-1684[UP3]	..((((((((((((((((((.&.))))))))))))))))))..	CUGGAAUGAAGCCUGGUCCGG&UCGGACCAGGCUUCAUUCCCC	0	0.000334049764817546
Qrob_T0357230.2:1697	qrb-miR166	Qrob_T0357230.2	1686	1705	1697	-42.00	-38.40	0.914285714285714	2	1-2,1705-1704;4-21,1703-1686	3-3,x-x[BULq]	((((((((((((((((((-((&)).))))))))))))))))))	GGAAUGAAGCCUGGUCCG-GA&UCUCGGACCAGGCUUCAUUCC	4	0.0287255726295408
Qrob_T0370790.2:1415	qrb-miR167	Qrob_T0370790.2	1404	1424	1415	-38.90	-31.90	0.820051413881748	4	3-13,1422-1412;15-21,1410-1404	1-2,1424-1423[UP5];14-14,1411-1411[SIL]	(((((((.(((((((((((..&..))))))))))).)))))))	UAGAUCAGGCUGGCAGCUUGU&UGAAGCUGCCAGCAUGAUCUA	2	0.0155797966321454
Qrob_T0380050.2:1122	qrb-miR393	Qrob_T0380050.2	1108	1131	1122	-36.60	-27.44	0.749726775956284	11	1-10,1131-1122;12-21,1117-1108	11-11,1121-1118[AILt]	((((((((((....((((((((((&))))))))))---.))))))))))	GGUCCAAGGGAACCGUGGCAUGAU&AUCAUGCUAU---CCCUUUGGACU	3	0.0413653514202335
Qrob_T0415350.2:869	qrb-miR396	Qrob_T0415350.2	858	879	869	-36.60	-30.70	0.83879781420765	4	1-6,879-874;7-19,872-860	x-x,873-873[BULt];20-21,859-858[UP3]	..(((((((((((((.((((((&))))))-)))))))))))))..	GCGUUCAAGAAAGCCUGUGGAA&UUCCAC-GGCUUUCUUGAACUG	0	0.00133552967289097
Qrob_T0438850.2:2006	qrb-miR160	Qrob_T0438850.2	1995	2015	2006	-45.20	-41.20	0.911504424778761	2	1-14,2015-2002;16-20,2000-1996	15-15,2001-2001[SIL];21-21,1995-1995[UP3]	.(((((.((((((((((((((&)))))))))))))).))))).	AGGCAUACAGGGAGCCAGGCA&UGCCUGGCUCCCUGAAUGCCA	0	0.000667987940389692
Qrob_T0466780.2:999	qrb-miR172	Qrob_T0466780.2	988	1008	999	-34.30	-22.60	0.658892128279884	7	2-6,1007-1003;8-18,1001-991	1-1,1008-1008[UP5];7-7,1002-1002[SIL];19-21,990-988[UP3]	...(((((((((((.(((((.&.))))).)))))))))))...	UAUCAGCAUCAUUAUGAUUCA&AGAAUCUUGAUGAUGCUGCAU	0	0.0495160917056032
Qrob_T0519660.2:938	novel_miRNA_UUAGUCCAAGACUCGGCCACA	Qrob_T0519660.2	927	947	938	-40.20	-26.90	0.669154228855721	4	2-13,946-935;15-16,933-932;18-20,930-928	1-1,947-947[UP5];14-14,934-934[SIL];17-17,931-931[SIL];21-21,927-927[UP3]	.(((.((.((((((((((((.&.)))))))))))).)).))).	CGUGUCCAAGUCUUGGACUAG&UUAGUCCAAGACUCGGCCACA	0	0.0437827536685519
Qrob_T0535990.2:1337	qrb-miR160	Qrob_T0535990.2	1326	1346	1337	-45.20	-41.20	0.911504424778761	2	1-14,1346-1333;16-20,1331-1327	15-15,1332-1332[SIL];21-21,1326-1326[UP3]	.(((((.((((((((((((((&)))))))))))))).))))).	AGGCAUACAGGGAGCCAGGCA&UGCCUGGCUCCCUGAAUGCCA	0	0.00100181456399284
Qrob_T0550890.2:141	qrb-miR171	Qrob_T0550890.2	129	150	141	-40.30	-31.10	0.771712158808933	5.5	2-14,149-137;17-22,134-129	1-1,150-150[UP5];15-16,136-135[SIL]	((((((..(((((((((((((.&.)))))))))))))..))))))	GGCGAGAGGUGCCAAUAUCGCU&UGUGAUAUUGGUACGGCUCGUC	4	0.0287255726295408
Qrob_T0602040.2:1176	qrb-miR166	Qrob_T0602040.2	1165	1185	1176	-44.10	-37.40	0.848072562358277	3.5	2-19,1184-1167	1-1,1185-1185[UP5];20-21,1166-1165[UP3]	..((((((((((((((((((.&.))))))))))))))))))..	CUGGGAUGAAGCCUGGUCCGG&UCGGACCAGGCUUCAUUCCCC	0	0.00100181456399284
Qrob_T0626770.2:2180	qrb-miR393	Qrob_T0626770.2	2168	2189	2180	-36.40	-33.30	0.914835164835165	4	1-18,2189-2172	19-22,2171-2168[UP3]	....((((((((((((((((((&))))))))))))))))))....	GAGACAAUGCGAUCCCUUUGGA&UCCAAAGGGAUCGCAUUGAUUU	2	0.0309168632011916
Qrob_T0632290.2:1607	qrb-miR162	Qrob_T0632290.2	1596	1616	1607	-37.50	-28.30	0.754666666666667	4.5	1-10,1616-1607;11-16,1605-1600;18-21,1599-1596	x-x,1606-1606[BULt];17-17,x-x[BULq]	((((-((((((.((((((((((&))))))))))-)))))).))))	CUGG-UGCGGGUGGUUUAUCGA&UCGAUAAACC-UCUGCAUCCAG	3	0.0277706043572652
Qrob_T0633190.2:559	qrb-miR166	Qrob_T0633190.2	548	568	559	-44.10	-37.70	0.854875283446712	3.5	2-19,567-550	1-1,568-568[UP5];20-21,549-548[UP3]	..((((((((((((((((((.&.))))))))))))))))))..	CCGGGAUGAAGCCUGGUCCGG&UCGGACCAGGCUUCAUUCCCC	0	0.000667987940389692
Qrob_T0636470.2:1343	qrb-miR160	Qrob_T0636470.2	1332	1352	1343	-45.20	-37.60	0.831858407079646	3	1-14,1352-1339;16-19,1337-1334	15-15,1338-1338[SIL];20-21,1333-1332[UP3]	..((((.((((((((((((((&)))))))))))))).))))..	UAGCAUGCAGGGAGCCAGGCA&UGCCUGGCUCCCUGAAUGCCA	0	0.00133552967289097
Qrob_T0642710.2:967	qrb-miR159	Qrob_T0642710.2	956	976	967	-36.50	-32.80	0.898630136986301	3.5	2-6,975-971;8-21,969-956	1-1,976-976[UP5];7-7,970-970[SIL]	((((((((((((((.(((((.&.))))).))))))))))))))	UGGAGCUCCCUUCACUCCAAU&UUUGGAUUGAAGGGAGCUCUA	2	0.0155797966321454
Qrob_T0653510.2:264	novel_miRNA_UUAGUCCAAGACUCGGCCACA	Qrob_T0653510.2	253	273	264	-40.20	-33.10	0.823383084577114	2.5	1-3,273-271;5-21,269-253	4-4,270-270[SIL]	(((((((((((((((((.(((&))).)))))))))))))))))	UGUGGCUGAGUCUUGGAAUAA&UUAGUCCAAGACUCGGCCACA	0	0.00765497841803531
Qrob_T0712850.2:216	qrb-miR535	Qrob_T0712850.2	205	225	216	-38.00	-29.40	0.773684210526316	8.5	1-7,225-219;10-18,216-208	8-9,218-217[SIL];19-21,207-205[UP3]	...(((((((((..(((((((&)))))))..)))))))))...	GGCGACGACGAGUUCGGGCAC&GUGCUCGUUCUCGUUGUCAUG	3	0.0277706043572652
Qrob_T0739060.2:605	novel_miRNA_UUGCCGAAUCCGCCCAUUCCUA	Qrob_T0739060.2	593	614	605	-42.80	-32.90	0.768691588785047	6.5	1-5,614-610;7-7,608-608;9-11,606-604;13-22,602-593	6-6,609-609[SIL];8-8,607-607[SIL];12-12,603-603[SIL]	((((((((((.(((.(.(((((&))))).).))).))))))))))	UGGGAAUGGGGGGACUGGGCAA&UUGCCGAAUCCGCCCAUUCCUA	0	0.0142638332934288
Qrob_T0759270.2:242	qrb-miR2111	Qrob_T0759270.2	231	251	242	-37.10	-32.40	0.873315363881402	3	1-18,251-234	19-21,233-231[UP3]	...((((((((((((((((((&))))))))))))))))))...	UGUACCUCAGGAUGCAGAUUA&UAAUCUGCAUCCUGAGGUCUA	2	0.0460149813921585
Qrob_T0769850.2:527	qrb-miR396	Qrob_T0769850.2	516	537	527	-36.60	-28.30	0.773224043715847	5	1-7,537-531;8-19,529-518	x-x,530-530[BULt];20-21,517-516[UP3]	..((((((((((((.(((((((&)))))))-))))))))))))..	GCGUUCAAGAAAGCUUGUGGAA&UUCCACG-GCUUUCUUGAACUG	0	0.00533142637975326

## Sheet: DS3_out
SiteID	Query	Transcript	TStart	TStop	TSlice	MFEperfect	MFEsite	MFEratio	AllenScore	Paired	Unpaired	Structure	Sequence	DegradomeCategory	DegradomePval
Qrob_T0004310.2:2404	qrb-miR319	Qrob_T0004310.2	2384	2413	2404	-41.60	-29.50	0.709134615384615	11	1-13,2413-2401;14-16,2390-2388;18-20,2386-2384	x-x,2400-2391[BULt];17-17,2387-2387[SIL]	(((.(((..........(((((((((((((&)))))))))))))----------))).)))	GGGCGCUGCAACGGGGACCCUUCAGUCCAA&UUGGACUGAAGGG----------AGCUCCC	0	0.00953752386916773
Qrob_T0026800.2:637	qrb-miR396	Qrob_T0026800.2	626	647	637	-36.60	-30.50	0.833333333333333	4	1-6,647-642;7-19,640-628	x-x,641-641[BULt];20-21,627-626[UP3]	..(((((((((((((.((((((&))))))-)))))))))))))..	CCGUUCAAGAAAGCCUGUGGAA&UUCCAC-GGCUUUCUUGAACUG	0	0.00177311086828935
Qrob_T0036220.2:1766	qrb-miR393	Qrob_T0036220.2	1754	1775	1766	-36.40	-33.50	0.92032967032967	4	1-18,1775-1758	19-22,1757-1754[UP3]	....((((((((((((((((((&))))))))))))))))))....	GAGGCAAUGCGAUCCCUUUGGA&UCCAAAGGGAUCGCAUUGAUUU	3	0.00992022788090186
Qrob_T0088850.2:1215	qrb-miR396	Qrob_T0088850.2	1204	1225	1215	-36.60	-30.70	0.83879781420765	4	1-6,1225-1220;7-19,1218-1206	x-x,1219-1219[BULt];20-21,1205-1204[UP3]	..(((((((((((((.((((((&))))))-)))))))))))))..	CCGUUCAAGAAAGCCUGUGGAA&UUCCAC-GGCUUUCUUGAACUG	1	0.00139623637035557
Qrob_T0122500.2:970	qrb-miR159	Qrob_T0122500.2	959	979	970	-36.50	-32.80	0.898630136986301	3.5	2-6,978-974;8-21,972-959	1-1,979-979[UP5];7-7,973-973[SIL]	((((((((((((((.(((((.&.))))).))))))))))))))	UGGAGCUCCCUUCACUCCAAU&UUUGGAUUGAAGGGAGCUCUA	4	0.0326872261321458
Qrob_T0125140.2:959	novel_miRNA_UUAGUCCAAGACUCGGCCACA	Qrob_T0125140.2	948	968	959	-40.20	-35.50	0.883084577114428	3	2-21,967-948	1-1,968-968[UP5]	((((((((((((((((((((.&.))))))))))))))))))))	UGUGGUUGAGUCUUGGGCUAG&UUAGUCCAAGACUCGGCCACA	1	0.0041828634049903
Qrob_T0125800.2:691	qrb-miR167	Qrob_T0125800.2	679	699	691	-42.10	-32.30	0.767220902612826	4.5	1-7,699-693;9-21,692-680	8-8,x-x[BULq];22-22,679-679[UP3]	.(((((((((((((-(((((((&))))))).))))))))))))).	GCGGAUCAUGCUGG-AGUUUCA&UGAAGCUGCCAGCAUGAUCUGA	3	0.0197420448405946
Qrob_T0128920.2:1152	qrb-miR156	Qrob_T0128920.2	1144	1161	1152	-32.90	-30.30	0.9209726443769	1	1-13,1161-1149;15-18,1147-1144	14-14,1148-1148[SIL]	((((.(((((((((((((&))))))))))))).))))	GCUCUCUCUCUUCUGUCA&UGACAGAAGAGAGUGAGC	1	0.00186121514242354
Qrob_T0156190.2:1730	qrb-miR167	Qrob_T0156190.2	1719	1739	1730	-38.90	-31.00	0.796915167095116	5	3-13,1737-1727;15-20,1725-1720	1-2,1739-1738[UP5];14-14,1726-1726[SIL];21-21,1719-1719[UP3]	.((((((.(((((((((((..&..))))))))))).)))))).	GAGAUCAGGCUGGCAGCUUGU&UGAAGCUGCCAGCAUGAUCUA	0	0.00177311086828935
Qrob_T0162660.2:1923	qrb-miR172	Qrob_T0162660.2	1912	1932	1923	-34.30	-34.20	0.997084548104956	2	1-20,1932-1913	21-21,1912-1912[UP3]	.((((((((((((((((((((&)))))))))))))))))))).	CUGCAGCAUCAUCAGGAUUCU&AGAAUCUUGAUGAUGCUGCAU	2	0.0192355130271376
Qrob_T0168090.2:205	novel_miRNA_UUUGGAAACGCACUUGAAUCG	Qrob_T0168090.2	194	214	205	-33.50	-34.20	1	0.5	1-21,214-194	NA	(((((((((((((((((((((&)))))))))))))))))))))	CGAUUCAGGUGCGUUUCCAAA&UUUGGAAACGCACUUGAAUCG	2	0.0381010210928581
Qrob_T0190770.2:2552	qrb-miR167	Qrob_T0190770.2	2541	2561	2552	-38.90	-31.00	0.796915167095116	5	3-13,2559-2549;15-20,2547-2542	1-2,2561-2560[UP5];14-14,2548-2548[SIL];21-21,2541-2541[UP3]	.((((((.(((((((((((..&..))))))))))).)))))).	GAGAUCAGGCUGGCAGCUUGU&UGAAGCUGCCAGCAUGAUCUA	0	0.00141874038696244
Qrob_T0191150.2:150	qrb-miR156	Qrob_T0191150.2	142	159	150	-32.90	-31.00	0.942249240121581	1	1-17,159-143	18-18,142-142[UP3]	.(((((((((((((((((&))))))))))))))))).	CCUCACUCUCUUCUGUCA&UGACAGAAGAGAGUGAGC	2	0.0192355130271376
Qrob_T0205770.2:926	novel_miRNA_UUAGUCCAAGACUCGGCCACA	Qrob_T0205770.2	915	935	926	-40.20	-38.60	0.960199004975124	1.5	2-21,934-915	1-1,935-935[UP5]	((((((((((((((((((((.&.))))))))))))))))))))	UGUGGCUGAGUCUUGGACUAG&UUAGUCCAAGACUCGGCCACA	0	0.00106424410413752
Qrob_T0233240.2:3026	qrb-miR390	Qrob_T0233240.2	3015	3035	3026	-44.30	-37.10	0.837471783295711	3.5	1-9,3035-3027;11-21,3025-3015	10-10,3026-3026[SIL]	(((((((((((.(((((((((&))))))))).)))))))))))	GGUGCUAUCCCAUCUGAGCUU&AAGCUCAGGAGGGAUAGCGCC	4	0.0326872261321458
Qrob_T0323550.2:1034	novel_miRNA_UUAGUCCAAGACUCGGCCACA	Qrob_T0323550.2	1023	1043	1034	-40.20	-38.80	0.965174129353234	0.5	1-21,1043-1023	NA	(((((((((((((((((((((&)))))))))))))))))))))	UGUGGUCGAGUCUUGGACUAA&UUAGUCCAAGACUCGGCCACA	0	0.000709621975155006
Qrob_T0323760.2:242	novel_miRNA_UUUGGAAACGCACUUGAAUCG	Qrob_T0323760.2	231	251	242	-33.50	-34.40	1	0.5	1-21,251-231	NA	(((((((((((((((((((((&)))))))))))))))))))))	CGAUUCAGGUGCGUUUCCAAA&UUUGGAAACGCACUUGAAUCG	0	0.00141874038696244
Qrob_T0327960.2:1388	qrb-miR160	Qrob_T0327960.2	1377	1397	1388	-45.20	-42.00	0.929203539823009	1	1-14,1397-1384;16-21,1382-1377	15-15,1383-1383[SIL]	((((((.((((((((((((((&)))))))))))))).))))))	UGGCAUGCAGGGAGCCAGGCA&UGCCUGGCUCCCUGAAUGCCA	0	0.000354873955339619
Qrob_T0332840.2:504	qrb-miR156	Qrob_T0332840.2	496	513	504	-32.90	-30.30	0.9209726443769	1	1-13,513-501;15-18,499-496	14-14,500-500[SIL]	((((.(((((((((((((&))))))))))))).))))	GCUCUCUCUCUUCUGUCA&UGACAGAAGAGAGUGAGC	0	0.00106424410413752
Qrob_T0332840.2:505	qrb-miR157	Qrob_T0332840.2	496	514	505	-32.00	-29.20	0.9125	2	1-11,514-504;13-19,502-496	12-12,503-503[SIL]	(((((((.(((((((((((&))))))))))).)))))))	GCUCUCUCUCUUCUGUCAA&UUGACAGAAGAUAGAGAGC	2	0.0381010210928581
Qrob_T0343720.2:1302	qrb-miR156	Qrob_T0343720.2	1294	1311	1302	-33.70	-29.40	0.87240356083086	2	2-13,1310-1299;15-18,1297-1294	1-1,1311-1311[UP5];14-14,1298-1298[SIL]	((((.((((((((((((.&.)))))))))))).))))	GCUCUCUCUCUUCUGUCA&CGACAGAAGAGAGUGAGC	0	0.00141874038696244
Qrob_T0349780.2:476	qrb-miR408	Qrob_T0349780.2	465	485	476	-45.30	-34.50	0.76158940397351	6	3-21,483-465	1-2,485-484[UP5]	(((((((((((((((((((..&..)))))))))))))))))))	CCGUGUUCUGCCUGUUCUUAU&CGGGGAACAGGCAGAGCAUGG	4	0.0326872261321458
Qrob_T0357230.2:1695	qrb-miR166	Qrob_T0357230.2	1684	1704	1695	-44.10	-37.90	0.859410430839002	3	2-19,1703-1686	1-1,1704-1704[UP5];20-21,1685-1684[UP3]	..((((((((((((((((((.&.))))))))))))))))))..	CUGGAAUGAAGCCUGGUCCGG&UCGGACCAGGCUUCAUUCCCC	0	0.000354873955339619
Qrob_T0370790.2:1415	qrb-miR167	Qrob_T0370790.2	1404	1424	1415	-38.90	-31.90	0.820051413881748	4	3-13,1422-1412;15-21,1410-1404	1-2,1424-1423[UP5];14-14,1411-1411[SIL]	(((((((.(((((((((((..&..))))))))))).)))))))	UAGAUCAGGCUGGCAGCUUGU&UGAAGCUGCCAGCAUGAUCUA	2	0.0192355130271376
Qrob_T0415350.2:869	qrb-miR396	Qrob_T0415350.2	858	879	869	-36.60	-30.70	0.83879781420765	4	1-6,879-874;7-19,872-860	x-x,873-873[BULt];20-21,859-858[UP3]	..(((((((((((((.((((((&))))))-)))))))))))))..	GCGUUCAAGAAAGCCUGUGGAA&UUCCAC-GGCUUUCUUGAACUG	0	0.00141874038696244
Qrob_T0438850.2:2006	qrb-miR160	Qrob_T0438850.2	1995	2015	2006	-45.40	-45.90	1	1	1-20,2015-1996	21-21,1995-1995[UP3]	.((((((((((((((((((((&)))))))))))))))))))).	AGGCAUACAGGGAGCCAGGCA&UGCCUGGCUCCCUGUAUGCCA	0	0.000709621975155006
Qrob_T0485420.2:128	novel_miRNA_UUUGGAAACGCACUUGAAUCG	Qrob_T0485420.2	117	137	128	-33.50	-30.50	0.91044776119403	2.5	1-6,137-132;8-21,130-117	7-7,131-131[SIL]	((((((((((((((.((((((&)))))).))))))))))))))	CGAUUCAAGUGCGUCUCCAAG&UUUGGAAACGCACUUGAAUCG	1	0.012496174361003
Qrob_T0488670.2:368	qrb-miR162	Qrob_T0488670.2	353	377	368	-37.50	-29.20	0.778666666666667	6.5	1-2,377-376;4-13,374-365;14-21,360-353	3-3,375-375[SIL];x-x,364-361[BULt]	((((((((....((((((((((.((&)).))))))))))----))))))))	CUGGAUGCAACUGGAGGUUUAUGGA&UCGAUAAACCUCU----GCAUCCAG	3	0.0197420448405946
Qrob_T0519660.2:938	novel_miRNA_UUAGUCCAAGACUCGGCCACA	Qrob_T0519660.2	927	947	938	-40.20	-26.90	0.669154228855721	4	2-13,946-935;15-16,933-932;18-20,930-928	1-1,947-947[UP5];14-14,934-934[SIL];17-17,931-931[SIL];21-21,927-927[UP3]	.(((.((.((((((((((((.&.)))))))))))).)).))).	CGUGUCCAAGUCUUGGACUAG&UUAGUCCAAGACUCGGCCACA	0	0.0461097086717146
Qrob_T0535990.2:1337	qrb-miR160	Qrob_T0535990.2	1326	1346	1337	-45.20	-41.20	0.911504424778761	2	1-14,1346-1333;16-20,1331-1327	15-15,1332-1332[SIL];21-21,1326-1326[UP3]	.(((((.((((((((((((((&)))))))))))))).))))).	AGGCAUACAGGGAGCCAGGCA&UGCCUGGCUCCCUGAAUGCCA	0	0.000709621975155006
Qrob_T0548860.2:164	novel_miRNA_UUUGGAAACGCACUUGAAUCG	Qrob_T0548860.2	153	173	164	-33.50	-33.00	0.985074626865672	1	1-20,173-154	21-21,153-153[UP3]	.((((((((((((((((((((&)))))))))))))))))))).	AGAUUCAAGUGCGUUUCCAAA&UUUGGAAACGCACUUGAAUCG	0	0.00283546794963929
Qrob_T0602040.2:1176	qrb-miR166	Qrob_T0602040.2	1165	1185	1176	-44.10	-37.40	0.848072562358277	3.5	2-19,1184-1167	1-1,1185-1185[UP5];20-21,1166-1165[UP3]	..((((((((((((((((((.&.))))))))))))))))))..	CUGGGAUGAAGCCUGGUCCGG&UCGGACCAGGCUUCAUUCCCC	1	0.00139623637035557
Qrob_T0626770.2:2180	qrb-miR393	Qrob_T0626770.2	2168	2189	2180	-36.40	-33.30	0.914835164835165	4	1-18,2189-2172	19-22,2171-2168[UP3]	....((((((((((((((((((&))))))))))))))))))....	GAGACAAUGCGAUCCCUUUGGA&UCCAAAGGGAUCGCAUUGAUUU	2	0.0381010210928581
Qrob_T0633190.2:559	qrb-miR166	Qrob_T0633190.2	548	568	559	-44.10	-37.70	0.854875283446712	3.5	2-19,567-550	1-1,568-568[UP5];20-21,549-548[UP3]	..((((((((((((((((((.&.))))))))))))))))))..	CCGGGAUGAAGCCUGGUCCGG&UCGGACCAGGCUUCAUUCCCC	0	0.000709621975155006
Qrob_T0636470.2:1343	qrb-miR160	Qrob_T0636470.2	1332	1352	1343	-45.20	-37.60	0.831858407079646	3	1-14,1352-1339;16-19,1337-1334	15-15,1338-1338[SIL];20-21,1333-1332[UP3]	..((((.((((((((((((((&)))))))))))))).))))..	UAGCAUGCAGGGAGCCAGGCA&UGCCUGGCUCCCUGAAUGCCA	0	0.00141874038696244
Qrob_T0642710.2:966	qrb-miR319	Qrob_T0642710.2	956	975	966	-41.60	-33.40	0.802884615384615	3	1-5,975-971;7-19,969-957	6-6,970-970[SIL];20-20,956-956[UP3]	.(((((((((((((.(((((&))))).))))))))))))).	UGGAGCUCCCUUCACUCCAA&UUGGACUGAAGGGAGCUCCC	3	0.0390943413467011
Qrob_T0642710.2:967	qrb-miR159	Qrob_T0642710.2	956	976	967	-36.50	-32.80	0.898630136986301	3.5	2-6,975-971;8-21,969-956	1-1,976-976[UP5];7-7,970-970[SIL]	((((((((((((((.(((((.&.))))).))))))))))))))	UGGAGCUCCCUUCACUCCAAU&UUUGGAUUGAAGGGAGCUCUA	2	0.0381010210928581
Qrob_T0769850.2:527	qrb-miR396	Qrob_T0769850.2	516	537	527	-36.60	-28.30	0.773224043715847	5	1-7,537-531;8-19,529-518	x-x,530-530[BULt];20-21,517-516[UP3]	..((((((((((((.(((((((&)))))))-))))))))))))..	GCGUUCAAGAAAGCUUGUGGAA&UUCCACG-GCUUUCUUGAACUG	0	0.00530990641293683
